# Supplementary material for: N1-Methyladenosine (m1A) Regulator-Mediated Methylation Modification Modes and Tumor Microenvironment Infiltration Characteristics in Head and Neck Squamous Cell Carcinomas
Source: Preprints.org preprint supplement (doi:10.20944/preprints202111.0004.v1), 2021-11-01
Supplement: Supplementary file 1 [file supplementary]

## Sheet: m6Ascore.group
Table S9. The detailed m1Ascore value of 769 HNSC patients in the high and low m1Ascore subgroup.
id	futime	fustat	m1Ascore	sampleType	group
TCGA-HD-7831	1.8274	0	0.243752	TCGA	High
TCGA-H7-7774	1.11507	0	-0.2273	TCGA	High
TCGA-CV-6943	1.64932	1	7.07784	TCGA	High
TCGA-CN-5374	4.74521	1	6.54961	TCGA	High
TCGA-CV-6959	0.70137	1	-1.74363	TCGA	High
TCGA-F7-A61V	2.07945	0	-1.85506	TCGA	High
TCGA-CV-7413	0.805479	1	-1.16019	TCGA	High
TCGA-QK-A64Z	1.75616	1	-5.11705	TCGA	Low
TCGA-CR-5249	3.15616	0	10.0476	TCGA	High
TCGA-CQ-5331	3.83288	0	0.421094	TCGA	High
TCGA-BB-8601	1.70959	0	-6.25313	TCGA	Low
TCGA-CV-A45W	3.83014	1	7.19707	TCGA	High
TCGA-CQ-7063	5.84384	0	-0.41007	TCGA	High
TCGA-CN-5373	4.33973	0	2.92335	TCGA	High
TCGA-CV-A45T	13.3041	1	4.07402	TCGA	High
TCGA-HD-A4C1	0.030137	0	-4.92404	TCGA	Low
TCGA-CV-5444	6.67671	0	3.89636	TCGA	High
TCGA-D6-8569	2.10959	0	-3.52333	TCGA	Low
TCGA-CV-6937	1.70959	1	-2.46939	TCGA	Low
TCGA-QK-A8ZB	1.48493	0	2.23204	TCGA	High
TCGA-CR-5250	2.18904	0	11.0057	TCGA	High
TCGA-CN-4729	1.07397	0	1.39245	TCGA	High
TCGA-CV-7089	5.40274	1	-3.23189	TCGA	Low
TCGA-BA-4075	0.775342	1	-9.53137	TCGA	Low
TCGA-T3-A92M	1.14247	0	5.4404	TCGA	High
TCGA-CN-5365	0.961644	1	-6.02941	TCGA	Low
TCGA-CV-7429	0.293151	1	-0.896211	TCGA	High
TCGA-QK-A652	1.76712	0	1.54686	TCGA	High
TCGA-F7-8298	2.72603	0	-2.24665	TCGA	Low
TCGA-CV-7416	2.09041	1	-6.01815	TCGA	Low
TCGA-H7-A6C4	1.13425	1	-2.12758	TCGA	Low
TCGA-CV-7102	0.153425	1	-1.92277	TCGA	High
TCGA-CV-7568	2.53973	1	-2.88762	TCGA	Low
TCGA-KU-A66S	1.11233	1	0.718268	TCGA	High
TCGA-QK-A6VC	1.64384	0	5.09624	TCGA	High
TCGA-CN-6998	0.978082	1	-8.82849	TCGA	Low
TCGA-CV-6941	0.936986	1	1.08495	TCGA	High
TCGA-CN-4727	4.27397	0	-6.60294	TCGA	Low
TCGA-BB-A5HY	0.879452	1	-8.39837	TCGA	Low
TCGA-CV-7263	1.53425	1	4.58304	TCGA	High
TCGA-H7-A76A	1.74521	0	9.04136	TCGA	High
TCGA-CN-4723	4.65479	0	1.53966	TCGA	High
TCGA-CN-6997	2.70685	1	1.17422	TCGA	High
TCGA-CN-5364	1.35068	1	1.39947	TCGA	High
TCGA-CN-A63V	1.86027	0	-0.0423199	TCGA	High
TCGA-CQ-5325	1.79178	1	5.13807	TCGA	High
TCGA-CR-7386	3.91781	0	4.43156	TCGA	High
TCGA-CX-A4AQ	4.26027	0	9.1961	TCGA	High
TCGA-CV-7410	17.5808	1	7.11895	TCGA	High
TCGA-BB-4225	0.4	0	8.96277	TCGA	High
TCGA-D6-A6EM	0.635616	0	0.138108	TCGA	High
TCGA-T2-A6WZ	1.32603	1	-0.319174	TCGA	High
TCGA-HD-8314	1.83562	0	7.57325	TCGA	High
TCGA-CN-A642	0.224658	1	-3.63737	TCGA	Low
TCGA-BB-A6UO	0.734247	1	-4.94305	TCGA	Low
TCGA-DQ-7591	1.70411	0	9.36781	TCGA	High
TCGA-CN-4739	3.81918	1	5.43023	TCGA	High
TCGA-CR-7398	0.427397	0	0.307398	TCGA	High
TCGA-HD-8634	1.05479	1	-4.40758	TCGA	Low
TCGA-CR-7372	2.07945	0	0.568917	TCGA	High
TCGA-HD-8224	1.22192	1	1.66644	TCGA	High
TCGA-CV-A45P	1.75068	0	-4.9508	TCGA	Low
TCGA-BB-A5HZ	2.26575	0	-3.89525	TCGA	Low
TCGA-CQ-5332	0.868493	1	1.95625	TCGA	High
TCGA-CQ-6224	4.71507	0	1.61615	TCGA	High
TCGA-CV-7424	1.2411	1	7.09081	TCGA	High
TCGA-HD-7832	2.29041	0	-5.19687	TCGA	Low
TCGA-QK-AA3J	1.27671	0	1.09984	TCGA	High
TCGA-BA-4077	3.10685	1	2.26401	TCGA	High
TCGA-CQ-A4C7	0.967123	1	-3.41324	TCGA	Low
TCGA-CQ-A4CB	2.44658	0	-0.0165244	TCGA	High
TCGA-F7-7848	3.09863	0	3.76638	TCGA	High
TCGA-CR-7392	3.90411	0	5.05317	TCGA	High
TCGA-CX-7082	0.030137	1	0.130066	TCGA	High
TCGA-CV-7414	0.0383562	1	-0.40648	TCGA	High
TCGA-CN-A63W	1.03288	1	-6.2846	TCGA	Low
TCGA-BA-5557	1.70685	0	0.594185	TCGA	High
TCGA-CR-6471	3.29315	1	4.75652	TCGA	High
TCGA-UF-A7JT	2.72055	1	-0.00640884	TCGA	High
TCGA-QK-A6IF	1.92877	0	12.2274	TCGA	High
TCGA-QK-A6IJ	1.06027	0	-4.12601	TCGA	Low
TCGA-CV-7248	1.4274	1	6.70956	TCGA	High
TCGA-UF-A7JD	2.02466	1	1.74106	TCGA	High
TCGA-RS-A6TP	1.4137	0	-5.4932	TCGA	Low
TCGA-CR-7399	0.49589	0	7.62146	TCGA	High
TCGA-CV-6948	3.53151	1	2.2842	TCGA	High
TCGA-CV-7101	0.438356	1	4.50693	TCGA	High
TCGA-CV-7247	1.58082	1	-2.9195	TCGA	Low
TCGA-DQ-5624	4.87123	0	-1.0168	TCGA	High
TCGA-H7-8502	1.25479	0	-5.63582	TCGA	Low
TCGA-CN-6989	2.68493	1	4.1024	TCGA	High
TCGA-CN-5360	5.94247	0	8.02109	TCGA	High
TCGA-MZ-A7D7	1.49863	0	-6.21491	TCGA	Low
TCGA-CV-A6JY	1.76986	0	-3.73823	TCGA	Low
TCGA-BA-5153	4.8274	1	10.3191	TCGA	High
TCGA-BB-8596	5.92055	0	6.02809	TCGA	High
TCGA-CR-7369	2.9863	1	2.68861	TCGA	High
TCGA-CQ-7071	3.59178	0	-2.01333	TCGA	High
TCGA-BA-A6DB	0.591781	0	4.99334	TCGA	High
TCGA-CQ-5327	4.54795	0	-1.25602	TCGA	High
TCGA-MT-A51X	0.663014	0	-2.34813	TCGA	Low
TCGA-4P-AA8J	0.279452	0	3.6402	TCGA	High
TCGA-CV-5439	1.49589	1	-1.86126	TCGA	High
TCGA-BA-A4IF	2.45205	0	-2.50296	TCGA	Low
TCGA-CV-5971	1.92055	0	4.72601	TCGA	High
TCGA-CN-6995	0.306849	1	-2.07673	TCGA	Low
TCGA-D6-A4Z9	1.47671	0	-3.00683	TCGA	Low
TCGA-DQ-5631	1.50137	1	-5.32296	TCGA	Low
TCGA-DQ-7588	1.16986	1	-13.5644	TCGA	Low
TCGA-CR-7373	2.43562	0	-4.12149	TCGA	Low
TCGA-CX-7085	0.879452	0	6.02865	TCGA	High
TCGA-F7-A50J	2.59452	0	-3.42857	TCGA	Low
TCGA-CQ-6228	1.24932	1	0.787283	TCGA	High
TCGA-CQ-6222	5.52329	0	2.91778	TCGA	High
TCGA-IQ-7630	1.32877	0	-5.63563	TCGA	Low
TCGA-D6-A6EP	1.16164	0	1.53542	TCGA	High
TCGA-D6-6825	1.34521	0	3.01699	TCGA	High
TCGA-CN-6013	1.99178	1	3.08547	TCGA	High
TCGA-CV-6939	1.82466	1	8.23681	TCGA	High
TCGA-CR-6477	1.40822	0	1.36992	TCGA	High
TCGA-WA-A7H4	1.2137	0	2.45897	TCGA	High
TCGA-CN-5358	0.715068	1	7.61344	TCGA	High
TCGA-CR-7397	2.06575	0	5.91199	TCGA	High
TCGA-CR-7376	2.66301	0	8.16931	TCGA	High
TCGA-F7-A61W	0.0383562	0	-11.7416	TCGA	Low
TCGA-BA-5558	5.46575	0	-0.815713	TCGA	High
TCGA-CV-5976	4.04932	0	-6.1134	TCGA	Low
TCGA-CV-6954	5.48493	1	-2.67468	TCGA	Low
TCGA-CR-7395	2.54795	0	2.89158	TCGA	High
TCGA-CV-7411	7.44384	1	-0.617058	TCGA	High
TCGA-D6-A6EQ	1.00822	0	0.469264	TCGA	High
TCGA-CV-A463	0.0630137	1	-3.4385	TCGA	Low
TCGA-CN-4722	4.06301	0	3.58294	TCGA	High
TCGA-CV-A45U	2.95616	1	0.107053	TCGA	High
TCGA-CV-A6JN	2.48219	0	-5.79148	TCGA	Low
TCGA-CR-5248	4.55616	0	11.6276	TCGA	High
TCGA-CV-6962	0.345205	1	-4.82841	TCGA	Low
TCGA-CR-6491	1.89863	0	-3.7782	TCGA	Low
TCGA-CV-7242	3	0	5.17818	TCGA	High
TCGA-CV-A45R	15.0137	0	1.19692	TCGA	High
TCGA-KU-A66T	1.51233	0	-9.35926	TCGA	Low
TCGA-BB-4223	8.82466	0	9.68782	TCGA	High
TCGA-CV-A468	1.27123	1	6.1146	TCGA	High
TCGA-D6-6516	2.11781	0	-1.27611	TCGA	High
TCGA-CQ-6219	1.31233	1	2.8152	TCGA	High
TCGA-CQ-6229	3.23014	0	-2.62641	TCGA	Low
TCGA-CN-A497	2.91781	0	1.54011	TCGA	High
TCGA-CR-7365	3.26301	0	-4.37597	TCGA	Low
TCGA-P3-A5QE	4.27123	0	6.86783	TCGA	High
TCGA-CV-5443	7.6274	0	11.1213	TCGA	High
TCGA-CR-7377	0.764384	1	6.18238	TCGA	High
TCGA-HD-7753	2.3726	0	-2.25985	TCGA	Low
TCGA-BA-A6DG	0.189041	1	0.76586	TCGA	High
TCGA-CQ-A4CD	2.8	0	-5.97768	TCGA	Low
TCGA-F7-A50G	1.68767	0	1.57843	TCGA	High
TCGA-HL-7533	2.89589	0	-1.52171	TCGA	High
TCGA-T2-A6X2	2.70411	0	-4.40949	TCGA	Low
TCGA-CV-5431	1.43014	1	8.42941	TCGA	High
TCGA-CN-6021	0.756164	1	2.4327	TCGA	High
TCGA-CN-6020	0.561644	1	1.12167	TCGA	High
TCGA-BA-A6DJ	1.11507	1	-6.08878	TCGA	Low
TCGA-CN-5355	3.50137	0	0.642991	TCGA	High
TCGA-D6-6826	0.953425	1	0.967021	TCGA	High
TCGA-UF-A7JJ	1.50411	0	5.328	TCGA	High
TCGA-CR-6488	1.03836	0	2.01127	TCGA	High
TCGA-HD-A633	1.15342	0	-7.32598	TCGA	Low
TCGA-CV-5977	5.0411	0	-12.0293	TCGA	Low
TCGA-CR-7364	3.93151	0	0.368087	TCGA	High
TCGA-CV-7421	0.00547945	1	3.73377	TCGA	High
TCGA-CQ-5323	4.01644	0	4.06774	TCGA	High
TCGA-UF-A718	5.4	0	1.60997	TCGA	High
TCGA-CQ-5333	0.934247	1	-0.949031	TCGA	High
TCGA-CN-5363	0.693151	1	-1.1778	TCGA	High
TCGA-QK-A6II	0.778082	1	-8.21603	TCGA	Low
TCGA-CN-5370	0.709589	1	2.33273	TCGA	High
TCGA-UF-A71D	4.00274	0	-2.75298	TCGA	Low
TCGA-UF-A71E	4.12055	1	-1.23537	TCGA	High
TCGA-CR-6492	1.31233	0	0.479552	TCGA	High
TCGA-CV-7104	1.07671	1	-0.359438	TCGA	High
TCGA-CN-A49C	1.76712	0	2.65896	TCGA	High
TCGA-CV-7238	7.47123	0	3.35052	TCGA	High
TCGA-CV-7099	0.665753	1	-2.10054	TCGA	Low
TCGA-QK-A6VB	1.75616	0	-6.58765	TCGA	Low
TCGA-CV-7432	7.0411	1	-10.1241	TCGA	Low
TCGA-IQ-A61H	3.11781	0	2.20731	TCGA	High
TCGA-CV-6956	0.594521	1	-10.1574	TCGA	Low
TCGA-MT-A51W	1.19726	0	-3.69637	TCGA	Low
TCGA-CQ-6221	2.73973	0	-0.894362	TCGA	High
TCGA-CV-6953	4.49589	1	-2.63583	TCGA	Low
TCGA-CN-4738	1.19452	1	2.63275	TCGA	High
TCGA-BA-A6DA	0.961644	0	-4.5328	TCGA	Low
TCGA-CR-6474	1.54521	1	1.52232	TCGA	High
TCGA-CQ-5334	0.353425	1	0.0519974	TCGA	High
TCGA-CV-7437	1.3863	1	-4.9932	TCGA	Low
TCGA-CV-7250	7.94521	1	-2.6521	TCGA	Low
TCGA-CV-5432	10.7671	0	-1.22232	TCGA	High
TCGA-CV-6934	0.178082	1	5.71651	TCGA	High
TCGA-CN-5356	3.86027	0	1.84297	TCGA	High
TCGA-CN-A498	2.11781	1	-2.18244	TCGA	Low
TCGA-CV-7406	4.78904	1	2.22766	TCGA	High
TCGA-CQ-6225	1.10411	1	-6.46108	TCGA	Low
TCGA-CN-4737	1.71233	0	-0.515806	TCGA	High
TCGA-C9-A480	1.05753	0	-4.72868	TCGA	Low
TCGA-D6-6824	0.210959	0	5.68611	TCGA	High
TCGA-CN-A63T	0.616438	0	2.27991	TCGA	High
TCGA-CV-7252	0.413699	1	-4.16541	TCGA	Low
TCGA-CV-6003	4.56164	0	-10.8855	TCGA	Low
TCGA-F7-A50I	0.252055	0	-1.63532	TCGA	High
TCGA-CV-7407	2.96164	1	1.00071	TCGA	High
TCGA-CN-4734	4.63014	0	-2.10123	TCGA	Low
TCGA-CV-7236	0.394521	1	-0.245328	TCGA	High
TCGA-CR-7382	2.18082	0	4.31818	TCGA	High
TCGA-CV-6938	0.394521	1	-2.90862	TCGA	Low
TCGA-CV-7433	1.64658	1	4.39286	TCGA	High
TCGA-CN-6022	0.769863	1	2.36376	TCGA	High
TCGA-CN-6023	4.33973	0	4.69826	TCGA	High
TCGA-CV-6933	7.50959	1	0.937892	TCGA	High
TCGA-CV-A45V	0.0876712	1	0.467378	TCGA	High
TCGA-BA-6870	1.23562	1	0.945227	TCGA	High
TCGA-DQ-5630	2.82192	0	2.61256	TCGA	High
TCGA-BA-4074	1.26575	1	-4.75105	TCGA	Low
TCGA-P3-A6SX	3.91781	1	-5.75161	TCGA	Low
TCGA-IQ-A61J	2.79726	0	1.93266	TCGA	High
TCGA-CR-7379	2.83836	0	-2.51674	TCGA	Low
TCGA-CV-A45Z	4.01644	1	3.61695	TCGA	High
TCGA-CN-4742	1.08767	1	0.40807	TCGA	High
TCGA-CV-A461	5.65479	1	3.87974	TCGA	High
TCGA-CR-7388	2.25479	1	6.40145	TCGA	High
TCGA-CR-7374	0.0821918	0	4.55154	TCGA	High
TCGA-CV-6961	0.208219	1	-0.14052	TCGA	High
TCGA-F7-A61S	1.57808	0	-3.61872	TCGA	Low
TCGA-BA-A6D8	2.32877	0	-0.319932	TCGA	High
TCGA-P3-A6T4	0.169863	1	-2.70179	TCGA	Low
TCGA-QK-A6V9	2.28219	0	8.78312	TCGA	High
TCGA-CV-5973	7.23562	0	-10.3089	TCGA	Low
TCGA-CR-7389	1.07397	0	4.24495	TCGA	High
TCGA-CV-6935	0.808219	1	0.54844	TCGA	High
TCGA-CN-6017	2.33699	1	6.18924	TCGA	High
TCGA-CQ-A4CE	2.45753	0	-0.078013	TCGA	High
TCGA-CR-7401	2.95068	0	-0.1909	TCGA	High
TCGA-CV-5436	1.6	1	-3.28789	TCGA	Low
TCGA-CR-6484	0.969863	0	5.41229	TCGA	High
TCGA-CR-6493	0.772603	1	-9.83815	TCGA	Low
TCGA-BA-4076	1.13699	1	-6.92316	TCGA	Low
TCGA-CV-7100	0.750685	1	-1.37481	TCGA	High
TCGA-BA-5556	1.9863	0	0.60715	TCGA	High
TCGA-F7-8489	1.80274	0	1.69503	TCGA	High
TCGA-CV-5979	3.60274	0	-7.70931	TCGA	Low
TCGA-CV-7095	1.56712	1	-5.39784	TCGA	Low
TCGA-CV-A6JM	0.531507	1	-6.76408	TCGA	Low
TCGA-QK-AA3K	0.693151	0	3.03694	TCGA	High
TCGA-BB-4224	0.761644	0	-6.05523	TCGA	Low
TCGA-UF-A71B	4.12603	0	0.572304	TCGA	High
TCGA-CR-7402	2.49589	0	1.34842	TCGA	High
TCGA-CN-4735	4.7589	0	8.96984	TCGA	High
TCGA-CV-6945	1.00274	1	-7.70643	TCGA	Low
TCGA-CV-6955	0.915068	1	-1.03925	TCGA	High
TCGA-CV-7253	0.989041	1	-11.5231	TCGA	Low
TCGA-P3-A6T8	1.09589	0	-2.15101	TCGA	Low
TCGA-CV-6936	0.454795	1	-0.301863	TCGA	High
TCGA-BA-5152	3.52877	0	0.800005	TCGA	High
TCGA-CR-5247	0.980822	0	-4.56858	TCGA	Low
TCGA-MT-A7BN	1.28493	0	2.3837	TCGA	High
TCGA-CN-A499	1.96438	0	-0.241784	TCGA	High
TCGA-QK-A8Z7	1.07397	0	1.75506	TCGA	High
TCGA-CV-7103	4.3589	1	1.94384	TCGA	High
TCGA-T2-A6X0	0.591781	0	5.15174	TCGA	High
TCGA-CV-A45Q	14.1151	1	-10.899	TCGA	Low
TCGA-CV-7245	2.18356	0	-4.30869	TCGA	Low
TCGA-P3-A6T2	6.29589	0	-8.00712	TCGA	Low
TCGA-CQ-A4C6	3.70685	0	-3.41417	TCGA	Low
TCGA-BA-6873	0.334247	0	-4.32243	TCGA	Low
TCGA-UF-A7JV	0.246575	1	-3.45485	TCGA	Low
TCGA-BA-4078	0.756164	1	4.89109	TCGA	High
TCGA-CV-6441	0.8	1	-7.54808	TCGA	Low
TCGA-CV-7434	0.59726	1	-8.36026	TCGA	Low
TCGA-CV-6952	0.506849	1	-3.56051	TCGA	Low
TCGA-CQ-5326	0.243836	1	-6.87623	TCGA	Low
TCGA-CN-A6V6	1.73973	0	8.32073	TCGA	High
TCGA-CN-4730	2.23836	0	-7.25213	TCGA	Low
TCGA-CN-6019	2.84384	0	7.88891	TCGA	High
TCGA-CQ-7069	3.49041	0	-5.45332	TCGA	Low
TCGA-CR-5243	7.01918	0	10.4987	TCGA	High
TCGA-BA-6868	1.29315	1	-6.44897	TCGA	Low
TCGA-CQ-5330	5.19726	0	2.02786	TCGA	High
TCGA-D6-6827	1.55616	0	5.79002	TCGA	High
TCGA-CN-6992	2.92055	0	4.87238	TCGA	High
TCGA-HD-8635	1.90411	0	0.899858	TCGA	High
TCGA-CV-7423	8.38082	1	-8.60406	TCGA	Low
TCGA-KU-A6H7	1.60548	0	8.43198	TCGA	High
TCGA-CR-6470	4.16712	0	13.0358	TCGA	High
TCGA-CV-A45O	2.33151	0	-5.01833	TCGA	Low
TCGA-CV-A6JU	0.30137	0	-2.5527	TCGA	Low
TCGA-CR-6487	0.641096	0	9.34764	TCGA	High
TCGA-CV-7427	13.0411	1	-1.27703	TCGA	High
TCGA-P3-A6T7	1.33425	1	-3.55257	TCGA	Low
TCGA-IQ-A61G	0.986301	0	-10.6236	TCGA	Low
TCGA-CV-A6JT	2.33425	0	-2.46129	TCGA	Low
TCGA-CV-7177	1.81644	1	1.58683	TCGA	High
TCGA-DQ-5629	2.57808	1	-1.45596	TCGA	High
TCGA-CV-7446	2.99452	1	1.51163	TCGA	High
TCGA-BA-A4IH	1.70411	0	8.75958	TCGA	High
TCGA-D6-A6EK	2.39726	0	0.118444	TCGA	High
TCGA-P3-A6T0	1.58356	0	-8.02115	TCGA	Low
TCGA-CV-A465	0.589041	1	-5.9971	TCGA	Low
TCGA-CR-7383	1.4274	1	3.68097	TCGA	High
TCGA-IQ-A61I	0.00547945	1	8.53272	TCGA	High
TCGA-D6-A4ZB	1.03014	0	1.3293	TCGA	High
TCGA-CV-5966	1.49315	1	-5.86455	TCGA	Low
TCGA-BA-A4II	2.51507	0	-0.504146	TCGA	High
TCGA-UP-A6WW	1.41918	0	8.21992	TCGA	High
TCGA-CR-6473	3.08219	0	3.21946	TCGA	High
TCGA-CV-7438	0.531507	1	-0.634194	TCGA	High
TCGA-CV-7097	1.05479	1	-1.17476	TCGA	High
TCGA-QK-A8Z9	1.23014	1	2.3325	TCGA	High
TCGA-UF-A7JO	1.72877	1	0.549804	TCGA	High
TCGA-CV-7180	0.89589	1	-6.11235	TCGA	Low
TCGA-D6-A6EO	2.07945	0	-1.57136	TCGA	High
TCGA-HD-A6I0	0.575342	0	-5.99246	TCGA	Low
TCGA-CV-6950	1.25753	1	-3.50473	TCGA	Low
TCGA-UF-A7JK	1.16164	1	-9.30805	TCGA	Low
TCGA-UF-A7JF	4.61918	0	-1.61835	TCGA	High
TCGA-CV-7428	4.57808	1	-0.588361	TCGA	High
TCGA-D6-A6ES	1.06575	0	-5.81773	TCGA	Low
TCGA-CQ-A4CH	1.03836	1	-2.64448	TCGA	Low
TCGA-D6-A6EN	1.88219	0	-2.92111	TCGA	Low
TCGA-CR-7394	3.68767	0	4.96636	TCGA	High
TCGA-CV-7425	4.70685	1	-2.64525	TCGA	Low
TCGA-CV-7254	3.99726	1	8.7656	TCGA	High
TCGA-CR-6478	0.50137	1	4.31429	TCGA	High
TCGA-TN-A7HL	1.69589	0	7.6852	TCGA	High
TCGA-CQ-6218	3.43288	0	-2.03024	TCGA	High
TCGA-HD-7229	2.8137	0	-4.12849	TCGA	Low
TCGA-MT-A67D	0.153425	0	3.44753	TCGA	High
TCGA-IQ-7631	3.21096	0	-0.00849656	TCGA	High
TCGA-CQ-7072	6.46301	0	-0.896028	TCGA	High
TCGA-BB-A6UM	1.07671	0	1.36164	TCGA	High
TCGA-MT-A67F	1.05205	0	0.00155981	TCGA	High
TCGA-H7-8501	1.26301	0	-1.57485	TCGA	High
TCGA-CN-A6V7	1.6274	0	-0.60116	TCGA	High
TCGA-BA-A8YP	1.36712	0	-0.637586	TCGA	High
TCGA-CN-A49B	2.47671	0	1.14293	TCGA	High
TCGA-CV-7183	10.9068	0	-6.59651	TCGA	Low
TCGA-CN-4736	1.08219	1	3.80177	TCGA	High
TCGA-CV-A6K1	1.87671	0	-6.02908	TCGA	Low
TCGA-P3-A5QF	0.90411	1	-2.97817	TCGA	Low
TCGA-CV-6960	2.36164	1	-7.66834	TCGA	Low
TCGA-P3-A6T5	2.41644	1	-2.21322	TCGA	Low
TCGA-CV-A6JZ	1.95616	0	2.32656	TCGA	High
TCGA-MZ-A6I9	1.33973	1	4.88003	TCGA	High
TCGA-CV-6433	1.75616	0	8.2786	TCGA	High
TCGA-CN-4725	3.16986	0	-6.89628	TCGA	Low
TCGA-BA-5151	1.97808	0	-0.979603	TCGA	High
TCGA-CR-6467	4.86849	0	10.0331	TCGA	High
TCGA-CN-4726	0.389041	1	-4.73006	TCGA	Low
TCGA-F7-A624	1.03562	0	-0.593335	TCGA	High
TCGA-CN-5359	1.03288	1	6.50801	TCGA	High
TCGA-BA-A6DL	1.70685	0	-2.21315	TCGA	Low
TCGA-QK-A6IH	1.78904	0	-7.90965	TCGA	Low
TCGA-HD-7754	2.14521	0	5.2151	TCGA	High
TCGA-BA-6869	1.76438	0	-2.11138	TCGA	Low
TCGA-TN-A7HI	1.12877	0	6.44087	TCGA	High
TCGA-CV-5440	8.9589	0	-2.59062	TCGA	Low
TCGA-MZ-A5BI	0.594521	1	9.0501	TCGA	High
TCGA-BB-4228	1.53151	0	7.77952	TCGA	High
TCGA-CV-5970	1.11233	1	1.1067	TCGA	High
TCGA-CQ-7065	4.46027	0	-11.9359	TCGA	Low
TCGA-QK-A8Z8	0.468493	1	-2.69013	TCGA	Low
TCGA-F7-A623	1.68767	0	0.0125345	TCGA	High
TCGA-P3-A6SW	3.06849	0	6.92078	TCGA	High
TCGA-CR-7368	3.41096	0	3.37727	TCGA	High
TCGA-CQ-A4C9	1.93699	0	1.9405	TCGA	High
TCGA-CR-7380	1.66027	1	0.0398939	TCGA	High
TCGA-CN-5369	0.00273973	1	3.13111	TCGA	High
TCGA-BA-A6DE	1.20548	0	-5.71091	TCGA	Low
TCGA-CV-5978	0.589041	1	5.91501	TCGA	High
TCGA-D6-6823	1.92055	0	-4.18458	TCGA	Low
TCGA-CN-6012	4	0	6.57793	TCGA	High
TCGA-CR-7393	2.72055	0	7.39838	TCGA	High
TCGA-CN-6994	3.2411	0	-1.07877	TCGA	High
TCGA-MT-A67A	2.50411	0	-3.05901	TCGA	Low
TCGA-CN-A63U	2.6411	0	-3.95362	TCGA	Low
TCGA-CV-7418	2.16164	1	2.15202	TCGA	High
TCGA-IQ-A6SG	1.5863	0	-4.95161	TCGA	Low
TCGA-CV-A6JE	2.94521	0	-3.29726	TCGA	Low
TCGA-BA-6872	1.05205	1	-3.76709	TCGA	Low
TCGA-CV-A460	5.03562	1	10.3848	TCGA	High
TCGA-BB-4227	0.367123	0	-8.01364	TCGA	Low
TCGA-CR-7391	2.50137	0	7.49889	TCGA	High
TCGA-CV-7415	1.90411	1	0.525288	TCGA	High
TCGA-CR-7385	2.73151	0	7.7981	TCGA	High
TCGA-BA-A6DI	0.920548	1	-2.74803	TCGA	Low
TCGA-CQ-A4CI	2.60274	0	-1.23174	TCGA	High
TCGA-BB-A5HU	2.14247	0	-4.1979	TCGA	Low
TCGA-HD-A634	0.356164	1	-5.13565	TCGA	Low
TCGA-CV-6436	5.20274	0	-3.4981	TCGA	Low
TCGA-CV-5434	9.07945	1	4.94942	TCGA	High
TCGA-D6-8568	2.07945	0	1.05316	TCGA	High
TCGA-CV-A6K0	1.66027	0	4.13846	TCGA	High
TCGA-CN-A6UY	1.95342	0	6.8617	TCGA	High
TCGA-P3-A5Q6	1.31507	1	-1.1402	TCGA	High
TCGA-F7-A620	1.48767	0	-0.901133	TCGA	High
TCGA-CN-A49A	1.4411	1	-0.172581	TCGA	High
TCGA-CV-5430	11.6192	0	7.68656	TCGA	High
TCGA-CV-7261	4.14247	0	3.60944	TCGA	High
TCGA-KU-A6H8	0.89589	1	2.68408	TCGA	High
TCGA-CR-7370	0.287671	0	2.40503	TCGA	High
TCGA-CN-A6V3	2.03288	0	0.216221	TCGA	High
TCGA-CN-5367	0.964384	1	-3.37781	TCGA	Low
TCGA-BA-5559	5.70685	1	12.5497	TCGA	High
TCGA-CV-7435	12.8219	1	4.19779	TCGA	High
TCGA-F7-A622	0.983562	1	-9.26534	TCGA	Low
TCGA-UF-A7JA	6.20548	0	1.51571	TCGA	High
TCGA-CR-6481	0.852055	0	10.3031	TCGA	High
TCGA-BA-A6DD	0.473973	1	2.15987	TCGA	High
TCGA-T3-A92N	0.260274	1	-4.39071	TCGA	Low
TCGA-TN-A7HJ	1.10411	0	-0.573483	TCGA	High
TCGA-UF-A7JC	1.49589	1	-9.67596	TCGA	Low
TCGA-P3-A5Q5	2.49315	0	6.24964	TCGA	High
TCGA-UF-A71A	0.235616	1	-2.15445	TCGA	Low
TCGA-D6-6515	1.10411	1	5.36497	TCGA	High
TCGA-IQ-7632	1.20822	0	-2.8396	TCGA	Low
TCGA-BA-A4IG	2.34247	0	3.99124	TCGA	High
TCGA-D6-6517	0.8	0	-1.33722	TCGA	High
TCGA-DQ-7592	3.13151	0	-3.53158	TCGA	Low
TCGA-CN-6988	0.871233	0	-7.02285	TCGA	Low
TCGA-CN-4740	2.29863	1	6.49992	TCGA	High
TCGA-CN-6018	1.58904	1	0.361772	TCGA	High
TCGA-CR-7367	3.94521	0	5.1586	TCGA	High
TCGA-P3-A6T6	1.08219	1	-3.15426	TCGA	Low
TCGA-CV-5435	6.35342	1	-3.07625	TCGA	Low
TCGA-BA-7269	3.48767	0	-1.66434	TCGA	High
TCGA-CR-7371	0.257534	1	5.61045	TCGA	High
TCGA-CR-6482	0.945205	0	9.93661	TCGA	High
TCGA-CV-7440	1.84932	1	-6.23709	TCGA	Low
TCGA-CV-A6K2	0.868493	1	-2.07397	TCGA	Low
TCGA-CV-5441	7.90685	0	-0.737637	TCGA	High
TCGA-CV-7178	5.93425	1	2.72726	TCGA	High
TCGA-BA-5555	1.42466	0	1.48435	TCGA	High
TCGA-UF-A7J9	3.72055	0	2.50055	TCGA	High
TCGA-CV-7091	9.26301	0	-0.706111	TCGA	High
TCGA-CV-5442	6.37534	0	-9.30929	TCGA	Low
TCGA-CN-6016	3.95342	0	3.92634	TCGA	High
TCGA-CV-6940	2.20274	1	-1.68214	TCGA	High
TCGA-QK-A6IG	0.608219	1	-4.43339	TCGA	Low
TCGA-CN-6996	1.45205	1	1.67125	TCGA	High
TCGA-CN-5361	5.80822	1	1.90987	TCGA	High
TCGA-IQ-A61E	3.14247	0	-6.16089	TCGA	Low
TCGA-RS-A6TO	1.06027	1	-2.58127	TCGA	Low
TCGA-CN-A641	1.00548	0	-4.47181	TCGA	Low
TCGA-CN-4741	6.13425	0	2.88899	TCGA	High
TCGA-CN-5366	0.986301	1	-1.38184	TCGA	High
TCGA-CN-4731	2.73425	1	-2.56013	TCGA	Low
TCGA-CQ-A4CG	1.17808	1	-6.83952	TCGA	Low
TCGA-CX-7219	2.86301	0	1.79745	TCGA	High
TCGA-IQ-A61O	1.15342	1	1.88955	TCGA	High
TCGA-CV-A6JD	0.49863	1	-3.38953	TCGA	Low
TCGA-T2-A6WX	0.572603	1	-2.27479	TCGA	Low
TCGA-P3-A6T3	1.58082	1	-10.6605	TCGA	Low
TCGA-UF-A7JH	2.45479	0	0.725439	TCGA	High
TCGA-P3-A5QA	5.97808	0	-4.94431	TCGA	Low
TCGA-CV-A45Y	7.40548	1	7.25882	TCGA	High
TCGA-QK-A8ZA	1.01644	1	-3.84453	TCGA	Low
TCGA-CQ-6220	2.69863	1	-6.25689	TCGA	Low
TCGA-CR-6472	2.87671	0	5.25316	TCGA	High
TCGA-WA-A7GZ	1.71233	1	-4.39404	TCGA	Low
TCGA-CV-6942	11.7315	0	4.61849	TCGA	High
TCGA-CN-6024	0.923288	1	-4.65057	TCGA	Low
TCGA-CN-6011	2.55616	0	-5.82282	TCGA	Low
TCGA-CR-6480	0.991781	0	4.89579	TCGA	High
TCGA-BB-4217	0.512329	0	7.91984	TCGA	High
TCGA-CQ-5324	4.36438	0	-0.728367	TCGA	High
TCGA-CQ-5329	5.87123	0	-1.35566	TCGA	High
TCGA-CV-7430	1.35616	1	-4.32375	TCGA	Low
TCGA-D6-A74Q	1.94521	0	1.48917	TCGA	High
TCGA-CV-7255	0.175342	1	-9.83738	TCGA	Low
TCGA-CQ-6223	3.91233	0	-1.1151	TCGA	High
TCGA-BA-6871	0.29589	1	6.68564	TCGA	High
TCGA-CV-A6JO	0.539726	1	-4.03539	TCGA	Low
TCGA-CR-7404	4.03288	0	8.26529	TCGA	High
TCGA-UF-A719	4.55616	0	-3.4074	TCGA	Low
TCGA-CQ-6227	0.353425	1	0.839508	TCGA	High
TCGA-CV-6951	2.50685	1	-5.05935	TCGA	Low
TCGA-CN-4728	4.72329	0	8.13359	TCGA	High
TCGA-CV-7090	14.389	0	-0.589627	TCGA	High
TCGA-DQ-5625	3.10411	1	-0.631235	TCGA	High
TCGA-UF-A7JS	1.86301	1	-2.89509	TCGA	Low
TCGA-CN-4733	4.34521	0	7.01077	TCGA	High
TCGA-CR-7390	4.13151	0	-5.11779	TCGA	Low
TCGA-CV-A45X	0.542466	1	-4.71941	TCGA	Low
TCGA-IQ-A6SH	1.29041	0	-1.83325	TCGA	High
TCGA-CQ-7068	3.5863	0	-1.85486	TCGA	High
TCGA-CV-A464	4.71781	0	0.725747	TCGA	High
TCGA-C9-A47Z	0.523288	1	-8.01082	TCGA	Low
TCGA-CN-6010	4.1726	0	4.98686	TCGA	High
TCGA-CV-7235	6.43014	0	1.98069	TCGA	High
TCGA-CX-7086	1.56986	0	-2.87728	TCGA	Low
TCGA-CV-7422	2.8411	1	3.25718	TCGA	High
TCGA-HD-A6HZ	0.30411	0	4.79759	TCGA	High
GSM1607684	3.0137	1	8.89439	GSE65858	High
GSM1607685	5.0274	1	6.95951	GSE65858	High
GSM1607686	6.55616	0	-2.06146	GSE65858	High
GSM1607687	3.32055	1	-2.0714	GSE65858	Low
GSM1607688	2.70411	0	1.9131	GSE65858	High
GSM1607689	5.31233	0	2.64554	GSE65858	High
GSM1607690	3.6411	1	2.51803	GSE65858	High
GSM1607691	2.57808	1	-3.83894	GSE65858	Low
GSM1607692	3.38082	1	-3.67918	GSE65858	Low
GSM1607693	2.80548	1	0.245345	GSE65858	High
GSM1607694	2.42192	1	1.82702	GSE65858	High
GSM1607695	2.8	1	2.5422	GSE65858	High
GSM1607696	2.93973	0	-2.74858	GSE65858	Low
GSM1607697	3.53151	1	5.4089	GSE65858	High
GSM1607698	2.92055	0	-3.88816	GSE65858	Low
GSM1607699	2.84384	1	-2.82542	GSE65858	Low
GSM1607700	1.5726	0	-6.22208	GSE65858	Low
GSM1607701	6.13699	0	6.00112	GSE65858	High
GSM1607702	4.89315	1	6.52179	GSE65858	High
GSM1607703	4.99178	1	-3.15461	GSE65858	Low
GSM1607704	1.63014	0	0.484489	GSE65858	High
GSM1607705	2.74795	1	-2.19364	GSE65858	Low
GSM1607706	2.89863	1	7.62156	GSE65858	High
GSM1607707	3.14795	1	-0.563531	GSE65858	High
GSM1607708	3.42192	1	2.62441	GSE65858	High
GSM1607709	3.93151	1	-0.113896	GSE65858	High
GSM1607710	3.43562	1	-1.08229	GSE65858	High
GSM1607711	2.91507	1	5.61476	GSE65858	High
GSM1607712	4.72329	0	-2.01315	GSE65858	High
GSM1607713	4.62192	1	0.524116	GSE65858	High
GSM1607714	1.29589	0	-5.84896	GSE65858	Low
GSM1607715	3.32603	0	-1.33179	GSE65858	High
GSM1607716	2.1726	0	5.54522	GSE65858	High
GSM1607717	2.65205	0	1.99029	GSE65858	High
GSM1607718	2.59452	1	-6.42549	GSE65858	Low
GSM1607719	2.55616	1	7.59768	GSE65858	High
GSM1607720	2.42466	1	6.2839	GSE65858	High
GSM1607721	2.42192	1	6.63052	GSE65858	High
GSM1607722	2.56712	1	-2.77047	GSE65858	Low
GSM1607723	3.00822	0	-5.15123	GSE65858	Low
GSM1607724	2.74521	0	-1.29404	GSE65858	High
GSM1607725	4.13151	1	-4.35633	GSE65858	Low
GSM1607726	3.26301	0	7.3658	GSE65858	High
GSM1607727	3.11507	1	5.0975	GSE65858	High
GSM1607728	3.50959	0	0.209447	GSE65858	High
GSM1607729	2.06301	0	-0.423547	GSE65858	High
GSM1607730	2.88219	1	-2.29753	GSE65858	Low
GSM1607731	3.15068	0	-4.08645	GSE65858	Low
GSM1607732	3.47945	0	-5.2117	GSE65858	Low
GSM1607733	5.5589	1	3.81221	GSE65858	High
GSM1607734	0.731507	0	1.30448	GSE65858	High
GSM1607735	3.33973	1	-1.03735	GSE65858	High
GSM1607736	2.94247	1	3.03495	GSE65858	High
GSM1607737	3.23014	0	1.56615	GSE65858	High
GSM1607738	2.92055	0	4.8687	GSE65858	High
GSM1607739	4.70411	1	4.3546	GSE65858	High
GSM1607740	5.6411	1	-0.592315	GSE65858	High
GSM1607741	0.484932	0	-2.35707	GSE65858	Low
GSM1607742	0.750685	0	-4.81789	GSE65858	Low
GSM1607743	5.37534	0	-0.872439	GSE65858	High
GSM1607744	5.48219	1	0.850231	GSE65858	High
GSM1607745	4.37534	1	-3.39761	GSE65858	Low
GSM1607746	2.58904	1	-2.45272	GSE65858	Low
GSM1607747	2.66849	1	-2.87496	GSE65858	Low
GSM1607748	2.74521	1	6.0693	GSE65858	High
GSM1607749	2.78356	1	2.07494	GSE65858	High
GSM1607750	2.75068	1	-3.08348	GSE65858	Low
GSM1607751	2.74521	0	-0.410158	GSE65858	High
GSM1607752	2.69041	1	1.65135	GSE65858	High
GSM1607753	2.63288	1	-0.964212	GSE65858	High
GSM1607754	2.6137	1	-2.3257	GSE65858	Low
GSM1607755	2.60548	0	-2.82533	GSE65858	Low
GSM1607756	2.5863	1	3.85516	GSE65858	High
GSM1607757	2.57808	1	-1.30532	GSE65858	High
GSM1607758	2.48219	0	7.88966	GSE65858	High
GSM1607759	2.53973	1	-1.12424	GSE65858	High
GSM1607760	2.45479	1	-4.81167	GSE65858	Low
GSM1607761	2.47397	0	2.07331	GSE65858	High
GSM1607762	2.39726	1	3.46045	GSE65858	High
GSM1607763	2.48219	1	-5.46725	GSE65858	Low
GSM1607764	4.95342	0	-2.12529	GSE65858	Low
GSM1607765	5.03288	1	12.0093	GSE65858	High
GSM1607766	0.832877	0	-2.63855	GSE65858	Low
GSM1607767	1.7863	0	-3.26963	GSE65858	Low
GSM1607768	5.56986	0	2.32221	GSE65858	High
GSM1607769	5.00548	1	-5.2495	GSE65858	Low
GSM1607770	5.12877	0	-2.32602	GSE65858	Low
GSM1607771	5.54795	1	6.39705	GSE65858	High
GSM1607772	5.08219	1	9.2269	GSE65858	High
GSM1607773	6.32877	1	-3.60059	GSE65858	Low
GSM1607774	1.36712	0	-0.368504	GSE65858	High
GSM1607775	1.86027	0	-2.41378	GSE65858	Low
GSM1607776	3.01096	1	-3.23729	GSE65858	Low
GSM1607777	3.33973	1	-4.17119	GSE65858	Low
GSM1607778	5.21644	1	-3.22512	GSE65858	Low
GSM1607779	0.0630137	0	-1.79844	GSE65858	High
GSM1607780	3.22192	1	-1.92846	GSE65858	High
GSM1607781	3.14247	1	0.365232	GSE65858	High
GSM1607782	3.2274	1	0.366982	GSE65858	High
GSM1607783	3.07671	1	5.74201	GSE65858	High
GSM1607784	2.87945	1	0.0368277	GSE65858	High
GSM1607785	3.24384	1	-4.36489	GSE65858	Low
GSM1607786	3.26575	1	-4.17383	GSE65858	Low
GSM1607787	4.95342	1	-2.98848	GSE65858	Low
GSM1607788	3.64932	1	-1.51861	GSE65858	High
GSM1607789	3.57534	1	2.29311	GSE65858	High
GSM1607790	2.80548	1	-6.01273	GSE65858	Low
GSM1607791	2.90411	1	4.06437	GSE65858	High
GSM1607792	1.64932	0	-4.54845	GSE65858	Low
GSM1607793	2.27671	0	-0.924859	GSE65858	High
GSM1607794	2.92329	1	1.32644	GSE65858	High
GSM1607795	0.323288	0	1.23171	GSE65858	High
GSM1607796	3.03288	1	-1.5588	GSE65858	High
GSM1607797	2.6137	1	-2.35422	GSE65858	Low
GSM1607798	2.28493	1	-0.900104	GSE65858	High
GSM1607799	0.693151	0	-2.41488	GSE65858	Low
GSM1607800	3.43014	1	2.23238	GSE65858	High
GSM1607801	1.4274	0	-3.12735	GSE65858	Low
GSM1607802	2.65205	1	-4.54735	GSE65858	Low
GSM1607803	1.17534	0	-3.76418	GSE65858	Low
GSM1607804	3.31781	1	-2.70749	GSE65858	Low
GSM1607805	3.23836	1	1.80914	GSE65858	High
GSM1607806	1.59452	0	2.90231	GSE65858	High
GSM1607807	2.72877	1	5.4292	GSE65858	High
GSM1607808	2.68219	1	-5.18434	GSE65858	Low
GSM1607809	2.85753	1	-3.71003	GSE65858	Low
GSM1607810	3.47945	0	2.67269	GSE65858	High
GSM1607811	2.42466	1	-5.85262	GSE65858	Low
GSM1607812	3.24658	1	-3.09175	GSE65858	Low
GSM1607813	2.22192	0	0.366612	GSE65858	High
GSM1607814	2.80548	1	-4.32409	GSE65858	Low
GSM1607815	2.34521	1	-3.34949	GSE65858	Low
GSM1607816	2.7863	1	1.37152	GSE65858	High
GSM1607817	1.33973	0	11.6293	GSE65858	High
GSM1607818	2.89589	1	4.30602	GSE65858	High
GSM1607819	2.89589	0	-1.87117	GSE65858	High
GSM1607820	2.76438	0	-2.67253	GSE65858	Low
GSM1607821	3.03288	1	-1.01137	GSE65858	High
GSM1607822	2.39726	1	0.0639289	GSE65858	High
GSM1607823	1.88767	0	1.78497	GSE65858	High
GSM1607824	0.753425	0	5.57933	GSE65858	High
GSM1607825	1.72877	0	-5.28358	GSE65858	Low
GSM1607826	3.73973	1	1.24532	GSE65858	High
GSM1607827	2.23288	1	6.95072	GSE65858	High
GSM1607828	2.1726	1	-1.33042	GSE65858	High
GSM1607829	0.975342	0	-2.33726	GSE65858	Low
GSM1607830	2.17534	1	-3.67925	GSE65858	Low
GSM1607831	2.1726	1	-0.458896	GSE65858	High
GSM1607832	0.745205	0	0.264465	GSE65858	High
GSM1607833	2.80822	1	-5.65138	GSE65858	Low
GSM1607834	2.01096	1	10.1572	GSE65858	High
GSM1607835	2.31781	1	-5.32961	GSE65858	Low
GSM1607836	1.95342	1	-3.46876	GSE65858	Low
GSM1607837	3.41096	1	1.32524	GSE65858	High
GSM1607838	1.9863	0	0.668774	GSE65858	High
GSM1607839	2.06849	1	-0.0752375	GSE65858	High
GSM1607840	2.07671	1	0.491735	GSE65858	High
GSM1607841	1.14247	0	1.04107	GSE65858	High
GSM1607842	3.53699	1	-1.65256	GSE65858	High
GSM1607843	0.736986	0	4.84029	GSE65858	High
GSM1607844	2	1	5.677	GSE65858	High
GSM1607845	2.41644	1	4.81643	GSE65858	High
GSM1607846	2.09315	1	-2.8238	GSE65858	Low
GSM1607847	2.90137	1	-0.952275	GSE65858	High
GSM1607848	2.03562	1	-4.03823	GSE65858	Low
GSM1607849	0.70411	0	1.42453	GSE65858	High
GSM1607850	1.69041	0	1.23193	GSE65858	High
GSM1607851	0.328767	0	-5.18012	GSE65858	Low
GSM1607852	3.18356	1	-1.87395	GSE65858	High
GSM1607853	2.07671	1	-2.08521	GSE65858	Low
GSM1607854	2.09589	1	-4.68615	GSE65858	Low
GSM1607855	0.4	0	0.751503	GSE65858	High
GSM1607856	0.572603	0	-2.54181	GSE65858	Low
GSM1607857	2.10685	1	6.42278	GSE65858	High
GSM1607858	2.15068	1	-2.33198	GSE65858	Low
GSM1607859	2.30959	1	-2.82555	GSE65858	Low
GSM1607860	2.26301	1	-3.9322	GSE65858	Low
GSM1607861	0.706849	0	2.66485	GSE65858	High
GSM1607862	0.380822	0	-1.84945	GSE65858	High
GSM1607863	1.94521	1	1.92468	GSE65858	High
GSM1607864	2.10685	1	-3.42492	GSE65858	Low
GSM1607865	0.835616	0	-5.5066	GSE65858	Low
GSM1607866	2.3863	1	-4.42033	GSE65858	Low
GSM1607867	1.27671	0	-1.87816	GSE65858	High
GSM1607868	2.34247	1	5.49004	GSE65858	High
GSM1607869	2.34795	1	-4.02017	GSE65858	Low
GSM1607870	2.30137	1	4.26853	GSE65858	High
GSM1607871	0.40274	0	11.6149	GSE65858	High
GSM1607872	0.49863	0	-3.51603	GSE65858	Low
GSM1607873	2.26027	1	0.785343	GSE65858	High
GSM1607874	2.16438	1	-4.98432	GSE65858	Low
GSM1607875	2.40274	1	-7.13698	GSE65858	Low
GSM1607876	2.2274	1	-1.82499	GSE65858	High
GSM1607877	0.734247	0	4.58829	GSE65858	High
GSM1607878	2.15068	1	6.65725	GSE65858	High
GSM1607879	2.12877	1	3.28876	GSE65858	High
GSM1607880	2.13151	1	5.00992	GSE65858	High
GSM1607881	2.15616	1	-2.22082	GSE65858	Low
GSM1607882	2.05479	1	-1.45168	GSE65858	High
GSM1607883	0.887671	0	-3.15344	GSE65858	Low
GSM1607884	3.05479	1	-3.44101	GSE65858	Low
GSM1607885	0.764384	0	-3.23472	GSE65858	Low
GSM1607886	2.03014	1	-5.03954	GSE65858	Low
GSM1607887	2.09315	1	4.57062	GSE65858	High
GSM1607888	2.10685	1	-1.29225	GSE65858	High
GSM1607889	2.05753	1	-0.69434	GSE65858	High
GSM1607890	0.580822	0	-4.41829	GSE65858	Low
GSM1607891	0.890411	0	13.128	GSE65858	High
GSM1607892	1.68767	0	0.225333	GSE65858	High
GSM1607893	2.12603	1	2.41876	GSE65858	High
GSM1607894	2.26027	1	2.08772	GSE65858	High
GSM1607895	3.71781	1	-4.43315	GSE65858	Low
GSM1607896	2.91233	0	-3.40492	GSE65858	Low
GSM1607897	0.805479	0	-0.751206	GSE65858	High
GSM1607898	1.86301	1	-4.48388	GSE65858	Low
GSM1607899	1.88767	1	0.538385	GSE65858	High
GSM1607900	1.8	1	-0.156919	GSE65858	High
GSM1607901	1.00274	0	5.83268	GSE65858	High
GSM1607902	1.67397	0	3.88101	GSE65858	High
GSM1607903	1.82192	1	-4.33061	GSE65858	Low
GSM1607904	1.92055	1	3.0577	GSE65858	High
GSM1607905	1.8	1	6.47477	GSE65858	High
GSM1607906	1.73151	1	-4.68095	GSE65858	Low
GSM1607907	0.441096	0	0.527843	GSE65858	High
GSM1607908	1.13699	0	-3.86519	GSE65858	Low
GSM1607909	1.69589	1	-4.20651	GSE65858	Low
GSM1607910	1.65753	1	4.98687	GSE65858	High
GSM1607911	1.7863	1	-3.30922	GSE65858	Low
GSM1607912	1.76164	1	0.00848167	GSE65858	High
GSM1607913	1.65205	1	-2.65536	GSE65858	Low
GSM1607914	3.31507	0	1.22773	GSE65858	High
GSM1607915	1.39726	0	7.43457	GSE65858	High
GSM1607916	1.8137	0	-3.29778	GSE65858	Low
GSM1607917	0.515068	0	-1.69743	GSE65858	High
GSM1607918	0.126027	0	10.7645	GSE65858	High
GSM1607919	2.14521	1	0.515906	GSE65858	High
GSM1607920	2.92329	1	-5.73259	GSE65858	Low
GSM1607921	0.942466	0	-5.9507	GSE65858	Low
GSM1607922	2.28219	1	-3.59733	GSE65858	Low
GSM1607923	2.20548	1	0.0866609	GSE65858	High
GSM1607924	0.421918	0	-6.28771	GSE65858	Low
GSM1607925	2.01096	1	-3.36939	GSE65858	Low
GSM1607926	0.542466	0	-2.70706	GSE65858	Low
GSM1607927	1.58356	0	6.25911	GSE65858	High
GSM1607928	0.947945	0	-1.02084	GSE65858	High
GSM1607929	1.63288	1	10.5584	GSE65858	High
GSM1607930	1.61644	1	0.846683	GSE65858	High
GSM1607931	1.63288	1	-5.14349	GSE65858	Low
GSM1607932	0.980822	0	2.94626	GSE65858	High
GSM1607933	1.61644	1	2.41608	GSE65858	High
GSM1607934	1.59452	1	-4.22417	GSE65858	Low
GSM1607935	1.59178	1	13.6967	GSE65858	High
GSM1607936	1.51507	1	-0.914857	GSE65858	High
GSM1607937	1.5726	1	-2.41667	GSE65858	Low
GSM1607938	1.65753	1	0.818666	GSE65858	High
GSM1607939	1.65205	1	-0.894609	GSE65858	High
GSM1607940	1.59452	1	0.252554	GSE65858	High
GSM1607941	1.58082	1	0.135151	GSE65858	High
GSM1607942	0.0547945	0	-3.58445	GSE65858	Low
GSM1607943	1.55068	1	-1.90696	GSE65858	High
GSM1607944	1.63288	1	3.25927	GSE65858	High
GSM1607945	1.8411	1	-2.18288	GSE65858	Low
GSM1607946	1.51233	1	-3.38186	GSE65858	Low
GSM1607947	1.50411	1	10.9555	GSE65858	High
GSM1607948	1.49589	1	5.19336	GSE65858	High
GSM1607949	1.54247	1	-1.38655	GSE65858	High
GSM1607950	1.70685	1	-2.0011	GSE65858	High
GSM1607951	1.63562	1	0.567525	GSE65858	High
GSM1607952	0.030137	0	3.10187	GSE65858	High
GSM1607953	1.58082	1	-4.0816	GSE65858	Low
