# Supplementary material for: N1-Methyladenosine (m1A) Regulator-Mediated Methylation Modification Modes and Tumor Microenvironment Infiltration Characteristics in Head and Neck Squamous Cell Carcinomas
Source: Preprints.org preprint supplement (doi:10.20944/preprints202111.0004.v1), 2021-11-01
Supplement: Supplementary file 3 [file Table S10.xlsx]

## Sheet: TCIA
Table S10. The detailed IPS data of TCGA-HNSC patients.
barcode	ips_ctla4_neg_pd1_neg	ips_ctla4_neg_pd1_pos	ips_ctla4_pos_pd1_neg	ips_ctla4_pos_pd1_pos
TCGA-CV-5442	6	4	5	4
TCGA-D6-6826	6	6	6	6
TCGA-CV-5443	6	7	6	7
TCGA-DQ-7590	6	7	7	8
TCGA-CV-5978	6	6	6	6
TCGA-BA-5557	6	6	6	6
TCGA-CN-A6V7	6	5	6	5
TCGA-CN-6022	7	7	7	6
TCGA-BB-8601	7	5	6	5
TCGA-P3-A5Q5	7	7	8	8
TCGA-CN-4725	7	6	7	6
TCGA-D6-6827	7	6	8	6
TCGA-CX-7219	7	7	7	7
TCGA-CV-7429	7	7	7	7
TCGA-DQ-7589	7	6	7	5
TCGA-BB-7861	7	8	7	8
TCGA-CR-7367	7	6	7	6
TCGA-CV-7103	7	6	7	5
TCGA-HD-7754	7	5	6	5
TCGA-CN-4737	7	6	7	6
TCGA-UF-A7JV	7	8	7	8
TCGA-CV-6933	7	6	6	5
TCGA-CQ-7063	7	9	7	9
TCGA-CV-7406	7	5	6	5
TCGA-UF-A71A	7	5	6	5
TCGA-CN-6024	7	6	6	5
TCGA-BB-4223	7	7	7	7
TCGA-CQ-5333	7	8	8	8
TCGA-CV-6935	7	6	7	6
TCGA-CV-A6JM	7	6	7	6
TCGA-CR-6472	7	6	7	5
TCGA-CV-5973	7	6	7	5
TCGA-IQ-A61H	7	7	6	6
TCGA-CN-5360	7	8	7	8
TCGA-CQ-6225	7	5	7	5
TCGA-BB-7866	7	7	7	7
TCGA-QK-A8ZA	7	7	7	7
TCGA-CN-6019	7	6	7	6
TCGA-CR-7370	7	7	6	7
TCGA-CR-5248	7	8	8	8
TCGA-CV-6962	7	5	6	5
TCGA-HD-8314	7	6	7	6
TCGA-MT-A7BN	7	7	8	7
TCGA-UF-A7JD	7	6	7	6
TCGA-CN-6989	7	7	7	7
TCGA-IQ-A6SG	7	5	6	4
TCGA-CR-6488	7	6	7	6
TCGA-CV-7177	7	6	7	6
TCGA-CV-5434	7	7	7	7
TCGA-BB-7862	7	6	7	5
TCGA-CR-7379	7	7	7	6
TCGA-CQ-5326	7	7	7	7
TCGA-CV-A460	7	7	7	7
TCGA-BA-4075	7	7	7	7
TCGA-CV-7421	7	6	7	5
TCGA-CQ-6222	7	8	7	8
TCGA-CN-4728	7	7	7	7
TCGA-MT-A67F	7	9	8	10
TCGA-CV-6940	7	6	7	5
TCGA-F7-7848	7	6	7	6
TCGA-UF-A7J9	7	7	7	6
TCGA-CN-5370	7	8	7	8
TCGA-UF-A7JO	7	8	8	8
TCGA-BB-8596	7	6	7	6
TCGA-CV-7099	7	8	7	7
TCGA-CR-7364	7	6	7	6
TCGA-QK-A6VB	7	6	7	5
TCGA-CQ-5332	7	6	6	5
TCGA-CN-6994	7	6	7	6
TCGA-CR-6473	7	6	7	6
TCGA-CN-5358	7	7	8	8
TCGA-CR-6477	7	7	7	7
TCGA-BA-A6DG	7	6	7	6
TCGA-CN-A63V	7	6	7	5
TCGA-IQ-A61O	7	7	7	7
TCGA-CR-7404	7	7	7	7
TCGA-BB-4227	7	6	7	5
TCGA-CQ-A4CH	7	6	6	5
TCGA-CR-7399	7	8	7	8
TCGA-CR-7385	7	7	7	7
TCGA-CR-7398	7	6	7	6
TCGA-CN-4740	7	7	7	6
TCGA-BB-4228	7	6	7	6
TCGA-CQ-5330	7	7	7	7
TCGA-CR-7382	7	8	7	8
TCGA-CN-5359	7	7	7	7
TCGA-BA-A8YP	7	6	7	6
TCGA-BA-A6D8	7	6	7	5
TCGA-CR-7376	7	8	7	8
TCGA-D6-A6ES	7	6	7	6
TCGA-CV-6953	7	6	6	5
TCGA-HD-7832	8	8	8	8
TCGA-QK-A6IG	8	8	8	9
TCGA-CV-6950	8	8	7	8
TCGA-CN-5366	8	8	8	7
TCGA-CV-7248	8	7	8	7
TCGA-D6-A6EP	8	6	8	6
TCGA-UF-A7JF	8	7	8	7
TCGA-CR-7386	8	8	8	8
TCGA-CQ-5325	8	10	8	10
TCGA-CN-6988	8	7	8	6
TCGA-D6-6825	8	9	8	9
TCGA-HD-8224	8	7	7	6
TCGA-CN-4742	8	7	8	7
TCGA-CN-5355	8	8	8	7
TCGA-CR-7372	8	7	8	7
TCGA-P3-A6T5	8	8	8	7
TCGA-CR-6478	8	9	8	9
TCGA-CV-A45Y	8	8	8	8
TCGA-F7-A624	8	9	8	9
TCGA-CX-7082	8	7	8	7
TCGA-CN-6996	8	9	8	9
TCGA-TN-A7HL	8	8	8	8
TCGA-D6-A6EQ	8	7	8	7
TCGA-CQ-5334	8	9	8	9
TCGA-DQ-7596	8	7	8	7
TCGA-CR-7393	8	8	8	7
TCGA-HD-7831	8	7	7	7
TCGA-DQ-5631	8	7	8	7
TCGA-UF-A71E	8	7	8	6
TCGA-CV-5970	8	7	8	7
TCGA-CV-7418	8	7	8	7
TCGA-UF-A7JT	8	9	8	9
TCGA-CQ-A4C7	8	8	8	8
TCGA-P3-A6SX	8	7	7	6
TCGA-QK-A6IF	8	7	8	8
TCGA-CV-7101	8	7	8	7
TCGA-CR-7373	8	9	8	9
TCGA-BA-5152	8	8	8	8
TCGA-CQ-A4CI	8	7	8	7
TCGA-KU-A66T	8	6	7	5
TCGA-BA-A4II	8	7	8	7
TCGA-CX-7085	8	8	8	8
TCGA-CV-6942	8	9	8	9
TCGA-QK-A8Z7	8	6	8	6
TCGA-CV-6960	8	6	7	6
TCGA-CV-A45W	8	8	7	8
TCGA-CV-7422	8	8	7	7
TCGA-BB-7863	8	8	8	7
TCGA-BB-A5HY	8	7	8	7
TCGA-CN-6998	8	8	8	8
TCGA-CR-7392	8	9	8	9
TCGA-CV-7090	8	8	8	8
TCGA-CQ-7069	8	7	8	7
TCGA-MZ-A7D7	8	6	7	6
TCGA-CV-7250	8	7	7	6
TCGA-CV-7438	8	8	8	8
TCGA-CQ-7068	8	9	8	9
TCGA-P3-A6T8	8	7	8	7
TCGA-CN-5364	8	7	8	7
TCGA-CV-5971	8	7	8	7
TCGA-CN-6012	8	8	8	8
TCGA-CV-7100	8	8	8	8
TCGA-CV-7428	8	8	8	8
TCGA-CV-6436	8	8	8	8
TCGA-CV-5430	8	7	8	7
TCGA-CR-7369	8	7	8	7
TCGA-F7-A50G	8	9	8	9
TCGA-CV-6951	8	7	8	6
TCGA-CV-A45R	8	8	8	8
TCGA-HD-A6HZ	8	7	8	8
TCGA-F7-A50J	8	8	8	8
TCGA-CQ-A4CD	8	8	8	8
TCGA-CR-7383	8	8	8	8
TCGA-CN-6997	8	7	8	6
TCGA-CN-6020	8	7	8	7
TCGA-H7-8502	8	8	8	7
TCGA-HD-7753	8	8	8	8
TCGA-C9-A480	8	8	8	7
TCGA-BA-7269	8	6	8	6
TCGA-T2-A6X0	8	8	8	8
TCGA-CV-7263	8	7	8	7
TCGA-BA-5559	8	8	8	9
TCGA-CN-4723	8	8	8	8
TCGA-CR-7395	8	8	8	9
TCGA-UF-A71B	8	7	8	6
TCGA-CV-7416	8	7	7	6
TCGA-CN-4738	8	8	8	8
TCGA-BB-A5HZ	8	7	8	7
TCGA-CR-7365	8	7	8	7
TCGA-CR-6484	8	9	8	9
TCGA-CV-7104	8	8	8	8
TCGA-MZ-A6I9	8	7	8	6
TCGA-CR-6481	8	8	8	8
TCGA-KU-A6H7	8	8	8	8
TCGA-CV-7097	8	8	7	7
TCGA-CQ-6224	8	8	8	7
TCGA-CV-5432	8	6	7	6
TCGA-IQ-7631	8	6	7	5
TCGA-BB-A5HU	8	7	7	6
TCGA-CV-7423	8	7	8	7
TCGA-CV-7254	8	8	8	8
TCGA-QK-A6IH	8	7	8	6
TCGA-CV-7427	8	9	8	9
TCGA-T3-A92N	8	8	8	7
TCGA-CV-7446	8	7	8	7
TCGA-CV-7183	8	7	8	6
TCGA-CV-7430	8	6	7	6
TCGA-BB-7864	8	6	7	6
TCGA-UP-A6WW	8	7	8	7
TCGA-CR-7371	8	7	7	7
TCGA-CV-7568	8	8	8	7
TCGA-CQ-7071	8	8	8	8
TCGA-CN-A49B	8	8	9	8
TCGA-BA-5556	8	9	8	9
TCGA-CN-6013	8	9	9	9
TCGA-CV-6948	8	7	8	7
TCGA-MZ-A5BI	8	9	9	9
TCGA-4P-AA8J	8	8	8	7
TCGA-CN-A497	8	7	8	7
TCGA-CQ-5324	8	7	7	7
TCGA-P3-A6T7	8	8	8	8
TCGA-BA-4076	8	7	8	7
TCGA-CN-4739	8	7	8	7
TCGA-TN-A7HI	8	7	8	7
TCGA-CR-6467	8	7	8	7
TCGA-CV-5444	8	8	8	8
TCGA-CV-6934	8	8	8	8
TCGA-CV-6943	8	9	8	9
TCGA-T2-A6WX	8	9	8	9
TCGA-P3-A5QA	8	8	7	8
TCGA-CV-7424	8	8	8	7
TCGA-CR-7388	8	7	8	7
TCGA-D6-6515	8	9	8	9
TCGA-CR-7391	8	8	8	8
TCGA-DQ-5625	8	9	8	9
TCGA-CN-5373	8	9	8	9
TCGA-CN-6992	8	7	7	6
TCGA-BA-A4IG	8	7	8	7
TCGA-CV-7261	8	7	8	7
TCGA-H7-A76A	8	8	8	8
TCGA-CQ-5327	8	9	8	8
TCGA-CV-7102	8	7	8	7
TCGA-CN-A6V6	8	8	8	9
TCGA-CQ-6227	8	8	8	7
TCGA-CQ-A4C6	8	9	8	9
TCGA-CN-4726	8	8	8	7
TCGA-CV-7247	8	7	8	6
TCGA-KU-A66S	8	7	9	8
TCGA-CN-A49A	8	6	7	5
TCGA-CN-A641	8	7	8	6
TCGA-CV-7434	8	9	7	9
TCGA-D6-6824	8	7	8	7
TCGA-C9-A47Z	8	9	8	9
TCGA-CV-5431	8	8	8	8
TCGA-CV-A45Q	8	8	8	7
TCGA-CV-7435	8	7	8	7
TCGA-CR-7390	8	6	7	6
TCGA-CQ-A4CB	8	8	8	8
TCGA-UF-A7JJ	8	8	9	8
TCGA-CN-6023	8	9	8	9
TCGA-BA-5558	8	7	8	7
TCGA-CQ-A4CG	8	8	7	7
TCGA-CV-6939	8	8	8	8
TCGA-CN-6011	8	8	8	8
TCGA-F7-8298	8	7	8	7
TCGA-CN-4722	8	7	8	7
TCGA-BA-5151	8	7	8	7
TCGA-P3-A6T2	8	8	8	8
TCGA-BA-4074	8	7	8	7
TCGA-CV-6941	8	7	8	7
TCGA-CN-4734	8	9	8	9
TCGA-RS-A6TO	8	8	8	8
TCGA-HD-8635	8	7	7	7
TCGA-BB-7871	8	7	8	7
TCGA-CR-7394	8	9	8	9
TCGA-CV-7425	8	9	8	9
TCGA-D6-6517	8	8	8	8
TCGA-CN-5369	8	8	8	8
TCGA-CV-5441	8	7	8	7
TCGA-BA-4078	8	7	7	7
TCGA-CN-6021	8	6	7	6
TCGA-CR-6474	8	8	8	7
TCGA-CN-5356	8	7	8	7
TCGA-CQ-6228	8	6	7	6
TCGA-P3-A6T0	8	7	7	6
TCGA-CN-6010	8	8	8	8
TCGA-BA-6871	8	8	8	8
TCGA-CV-7433	8	8	8	8
TCGA-CV-A6K0	8	8	8	9
TCGA-CV-6433	8	8	8	8
TCGA-CQ-7072	8	7	8	6
TCGA-CV-6959	8	8	8	8
TCGA-H7-8501	8	9	8	10
TCGA-HD-A634	8	6	7	5
TCGA-CV-A6K2	8	8	8	7
TCGA-D6-6516	8	8	8	8
TCGA-BA-5149	8	8	8	8
TCGA-BB-A6UO	8	8	8	8
TCGA-CN-A642	8	8	8	8
TCGA-CV-A45Z	8	8	8	8
TCGA-BA-5153	8	8	8	8
TCGA-CN-A49C	8	7	8	7
TCGA-DQ-5624	8	7	8	7
TCGA-CR-6470	8	8	8	8
TCGA-CN-A499	8	8	8	8
TCGA-CR-7397	8	7	8	7
TCGA-HD-7917	8	8	8	7
TCGA-CN-4735	8	7	8	7
TCGA-CV-6938	8	8	8	8
TCGA-CN-6016	8	7	8	7
TCGA-UF-A71D	9	8	8	7
TCGA-CN-4729	9	8	8	8
TCGA-CN-A498	9	8	9	8
TCGA-CN-4730	9	7	8	6
TCGA-P3-A5QE	9	9	9	9
TCGA-CV-7236	9	8	8	7
TCGA-CN-6995	9	9	9	9
TCGA-P3-A6SW	9	10	9	10
TCGA-CV-A461	9	9	9	9
TCGA-QK-A8ZB	9	7	8	7
TCGA-QK-A6VC	9	9	9	9
TCGA-BA-6872	9	8	8	7
TCGA-DQ-7591	9	8	9	8
TCGA-CV-A6K1	9	8	9	8
TCGA-CV-6961	9	8	9	8
TCGA-CV-6003	9	8	9	8
TCGA-WA-A7H4	9	8	9	8
TCGA-D6-A6EO	9	8	9	7
TCGA-CV-A6JD	9	9	9	9
TCGA-P3-A5Q6	9	8	9	7
TCGA-P3-A5QF	9	8	8	7
TCGA-CR-6482	9	9	9	9
TCGA-CV-7089	9	9	8	9
TCGA-QK-A652	9	8	9	8
TCGA-CV-7242	9	8	9	8
TCGA-BA-4077	9	9	9	9
TCGA-CV-A6JZ	9	9	9	9
TCGA-CV-5966	9	9	9	9
TCGA-BA-A6DJ	9	9	9	9
TCGA-UF-A7JS	9	7	9	7
TCGA-CV-A45P	9	8	9	8
TCGA-CV-A468	9	8	9	8
TCGA-CN-4736	9	9	8	9
TCGA-CV-A6JN	9	9	10	9
TCGA-CV-5979	9	8	9	8
TCGA-CV-5440	9	7	8	7
TCGA-BA-A6DE	9	8	9	8
TCGA-MT-A67D	9	8	9	8
TCGA-BA-A6DB	9	8	9	8
TCGA-CQ-7065	9	7	8	7
TCGA-UF-A718	9	8	9	8
TCGA-CN-4727	9	7	8	7
TCGA-CN-A63U	9	8	9	7
TCGA-HD-8634	9	9	9	8
TCGA-CV-5976	9	7	8	7
TCGA-CN-6017	9	9	9	10
TCGA-BB-4217	9	8	9	8
TCGA-CV-7252	9	9	9	8
TCGA-CN-4741	9	8	9	8
TCGA-CR-7368	9	8	9	8
TCGA-QK-A64Z	9	8	9	8
TCGA-CN-5363	9	9	9	9
TCGA-CV-7091	9	8	9	8
TCGA-CV-7235	9	9	9	9
TCGA-CV-A45X	9	7	8	7
TCGA-CQ-5329	9	9	9	8
TCGA-CN-A6V1	9	9	10	10
TCGA-CN-5361	9	8	8	8
TCGA-CV-A6JY	9	7	8	7
TCGA-CV-7410	9	10	9	10
TCGA-CV-A45T	9	9	9	9
TCGA-CQ-6221	9	7	8	7
TCGA-D6-8569	9	8	9	8
TCGA-CV-7178	9	9	9	8
TCGA-F7-A61W	9	8	8	8
TCGA-P3-A6T3	9	8	8	7
TCGA-QK-AA3K	9	8	9	8
TCGA-DQ-5630	9	9	9	9
TCGA-CR-7402	9	9	9	8
TCGA-CV-6945	9	8	9	7
TCGA-CV-A6JO	9	9	9	9
TCGA-BA-A6DL	9	8	9	7
TCGA-BA-A6DI	9	9	9	8
TCGA-CN-4733	9	10	9	10
TCGA-UF-A7JH	9	8	9	8
TCGA-CV-A45V	9	8	8	8
TCGA-BA-A6DA	9	8	8	7
TCGA-CV-5436	9	9	9	8
TCGA-F7-A61V	9	8	9	8
TCGA-CQ-6219	9	9	9	9
TCGA-CQ-6220	9	9	9	9
TCGA-UF-A7JA	9	7	8	7
TCGA-CR-6492	9	8	8	8
TCGA-CR-6487	9	10	9	10
TCGA-KU-A6H8	9	8	8	7
TCGA-F7-A622	9	8	9	7
TCGA-D6-A6EM	9	9	9	9
TCGA-D6-A6EN	9	9	9	9
TCGA-CV-7415	9	10	9	10
TCGA-HD-A633	9	7	8	7
TCGA-DQ-7592	9	8	9	8
TCGA-BB-7870	9	7	8	7
TCGA-BB-4225	9	8	9	8
TCGA-CV-7414	9	8	9	7
TCGA-BA-A6DD	9	8	9	8
TCGA-CQ-6223	9	8	9	8
TCGA-T3-A92M	9	8	9	8
TCGA-CQ-5331	9	9	9	9
TCGA-QK-A6V9	9	8	9	9
TCGA-CV-A6JT	9	8	9	8
TCGA-CR-7377	9	9	9	9
TCGA-HD-A6I0	9	9	9	9
TCGA-CQ-5323	9	9	9	8
TCGA-MT-A51W	9	8	9	8
TCGA-D6-A4ZB	9	8	9	7
TCGA-WA-A7GZ	9	8	9	7
TCGA-CV-A465	9	7	9	7
TCGA-BA-6869	9	8	9	8
TCGA-CQ-7067	9	8	9	8
TCGA-CQ-A4CE	9	8	8	8
TCGA-D6-6823	9	8	8	7
TCGA-F7-A623	9	7	8	7
TCGA-T2-A6X2	9	8	9	8
TCGA-HD-A4C1	9	8	8	8
TCGA-CV-7238	9	8	9	8
TCGA-F7-A50I	9	8	8	8
TCGA-F7-A61S	9	10	9	10
TCGA-CV-A45U	9	8	9	8
TCGA-CN-A6V3	9	8	9	8
TCGA-QK-A8Z9	9	8	9	8
TCGA-DQ-7588	9	7	8	7
TCGA-CN-5365	9	9	9	9
TCGA-CV-6952	9	9	9	9
TCGA-CV-5977	9	9	9	9
TCGA-CV-7407	9	8	9	8
TCGA-CV-6956	9	7	8	6
TCGA-F7-8489	9	10	10	10
TCGA-CV-7255	9	8	8	7
TCGA-CR-7380	9	8	8	8
TCGA-RS-A6TP	9	9	9	9
TCGA-UF-A7JC	9	8	8	7
TCGA-CN-6018	9	9	8	8
TCGA-D6-A4Z9	9	8	8	8
TCGA-IQ-A6SH	9	9	9	9
TCGA-BB-4224	9	7	8	6
TCGA-CV-6441	9	7	8	7
TCGA-HD-7229	9	9	8	9
TCGA-D6-8568	9	8	9	8
TCGA-CR-6491	9	8	9	8
TCGA-CV-7411	9	8	9	8
TCGA-IQ-7632	9	8	9	7
TCGA-CN-A6UY	9	9	9	9
TCGA-CN-5367	9	8	9	7
TCGA-DQ-7594	9	9	9	9
TCGA-CQ-6218	9	8	9	8
TCGA-CV-7440	9	8	8	7
TCGA-DQ-7593	9	8	9	9
TCGA-CR-5247	9	7	8	7
TCGA-CQ-A4C9	9	7	8	7
TCGA-DQ-5629	9	7	8	7
TCGA-CV-7432	9	8	8	7
TCGA-F7-A620	9	10	9	10
TCGA-HL-7533	9	10	8	10
TCGA-CV-7409	9	9	9	9
TCGA-CX-7086	9	8	8	7
TCGA-CV-7180	9	8	9	7
TCGA-IQ-7630	9	8	9	8
TCGA-H7-A6C4	9	9	9	9
TCGA-IQ-A61I	9	8	9	8
TCGA-CV-7245	9	8	9	7
TCGA-P3-A6T4	9	8	9	8
TCGA-CR-5249	9	9	9	9
TCGA-CR-6480	9	9	9	8
TCGA-CR-5250	9	8	8	7
TCGA-CV-A45O	9	9	8	8
TCGA-BA-6868	9	7	9	7
TCGA-CR-6471	9	9	8	8
TCGA-MT-A67A	9	8	8	7
TCGA-CR-7401	9	8	9	8
TCGA-CR-5243	9	8	9	8
TCGA-CQ-6229	9	9	9	9
TCGA-D6-A74Q	9	8	9	8
TCGA-BA-A4IH	9	8	9	8
TCGA-CV-A6JE	9	9	9	9
TCGA-BA-6873	9	10	9	9
TCGA-IQ-A61J	9	8	9	8
TCGA-CV-7095	9	7	8	7
TCGA-UF-A719	9	8	9	8
TCGA-CV-5435	9	8	8	7
TCGA-CV-7413	9	8	9	8
TCGA-TN-A7HJ	9	7	9	7
TCGA-CR-6493	9	9	8	8
TCGA-CN-A63T	9	8	9	8
TCGA-CV-7437	9	7	8	7
TCGA-MT-A51X	10	8	9	8
TCGA-QK-A6II	10	9	9	9
TCGA-CV-5439	10	9	10	9
TCGA-CV-6954	10	9	9	8
TCGA-UF-A7JK	10	8	9	7
TCGA-CV-A464	10	9	10	9
TCGA-BA-A4IF	10	8	9	7
TCGA-BB-A6UM	10	9	10	9
TCGA-P3-A6T6	10	8	9	8
TCGA-D6-A6EK	10	9	10	9
TCGA-CV-6936	10	9	9	8
TCGA-T2-A6WZ	10	9	10	8
TCGA-CX-A4AQ	10	9	10	9
TCGA-QK-A8Z8	10	8	10	8
TCGA-CV-7253	10	8	9	7
TCGA-CV-6937	10	8	9	7
TCGA-CV-6955	10	9	9	9
TCGA-IQ-A61G	10	8	9	8
TCGA-DQ-7595	10	8	9	7
TCGA-CQ-A4CA	10	9	10	9
TCGA-CV-A463	10	9	10	8
TCGA-CV-7243	10	8	9	8
TCGA-CR-7374	10	8	9	8
TCGA-BA-6870	10	9	10	9
TCGA-BA-5555	10	9	10	9
TCGA-CN-4731	10	9	10	8
TCGA-BB-7872	10	9	9	9
TCGA-CR-7389	10	9	10	9
TCGA-CN-A63W	10	8	9	8
TCGA-QK-AA3J	10	8	10	8
TCGA-IQ-A61E	10	10	10	10
TCGA-H7-7774	10	9	9	9
TCGA-QK-A6IJ	10	9	10	9
TCGA-CV-A6JU	10	8	10	8
TCGA-CN-5374	10	9	10	8
