# Supplementary material for: N1-Methyladenosine (m1A) Regulator-Mediated Methylation Modification Modes and Tumor Microenvironment Infiltration Characteristics in Head and Neck Squamous Cell Carcinomas
Source: Preprints.org preprint supplement (doi:10.20944/preprints202111.0004.v1), 2021-11-01
Supplement: Supplementary file 5 [file Table S3.xlsx]

## Sheet: Sheet 1
Table S3. The correlation analysis between ALKBH1 expression and immune cell.
Gene	immune cell	correlation coefficient(Pearson)	P-value(Pearson)	correlation coefficient(Spearman)	P-value(Spearman)
ALKBH1	aDC	-0.048	0.288	-0.040	0.371
ALKBH1	B cells	-0.071	0.112	-0.060	0.182
ALKBH1	CD8 T cells	-0.075	0.091	-0.075	0.095
ALKBH1	Cytotoxic cells	-0.152	<0.001	-0.134	0.003
ALKBH1	DC	-0.209	<0.001	-0.212	<0.001
ALKBH1	Eosinophils	-0.034	0.441	-0.102	0.023
ALKBH1	iDC	-0.191	<0.001	-0.214	<0.001
ALKBH1	Macrophages	-0.072	0.109	-0.095	0.034
ALKBH1	Mast cells	-0.223	<0.001	-0.250	<0.001
ALKBH1	Neutrophils	-0.214	<0.001	-0.249	<0.001
ALKBH1	NK CD56bright cells	0.057	0.201	0.079	0.076
ALKBH1	NK CD56dim cells	-0.159	<0.001	-0.139	0.002
ALKBH1	NK cells	-0.088	0.048	-0.114	0.011
ALKBH1	pDC	-0.185	<0.001	-0.168	<0.001
ALKBH1	T cells	-0.123	0.006	-0.110	0.013
ALKBH1	T helper cells	0.198	<0.001	0.174	<0.001
ALKBH1	Tcm	0.051	0.254	0.041	0.360
ALKBH1	Tem	-0.046	0.308	-0.056	0.214
ALKBH1	TFH	-0.115	0.010	-0.122	0.006
ALKBH1	Tgd	0.006	0.886	-0.022	0.626
ALKBH1	Th1 cells	-0.080	0.073	-0.079	0.075
ALKBH1	Th17 cells	-0.099	0.026	-0.132	0.003
ALKBH1	Th2 cells	0.219	<0.001	0.200	<0.001
ALKBH1	TReg	-0.147	<0.001	-0.153	<0.001
