# Supplementary material for: N1-Methyladenosine (m1A) Regulator-Mediated Methylation Modification Modes and Tumor Microenvironment Infiltration Characteristics in Head and Neck Squamous Cell Carcinomas
Source: Preprints.org preprint supplement (doi:10.20944/preprints202111.0004.v1), 2021-11-01
Supplement: Supplementary file 6 [file Table S4.xlsx]

## Sheet: Sheet 1
Table S4. The correlation analysis between ALKBH3 expression and immune cell.
Gene	immune cell	correlation coefficient(Pearson)	P-value(Pearson)	correlation coefficient(Spearman)	P-value(Spearman)
ALKBH3	aDC	-0.092	0.039	-0.066	0.141
ALKBH3	B cells	-0.075	0.095	-0.090	0.043
ALKBH3	CD8 T cells	-0.058	0.197	-0.047	0.289
ALKBH3	Cytotoxic cells	-0.076	0.090	-0.053	0.233
ALKBH3	DC	-0.117	0.009	-0.162	<0.001
ALKBH3	Eosinophils	-0.175	<0.001	-0.211	<0.001
ALKBH3	iDC	-0.159	<0.001	-0.182	<0.001
ALKBH3	Macrophages	-0.185	<0.001	-0.202	<0.001
ALKBH3	Mast cells	-0.209	<0.001	-0.249	<0.001
ALKBH3	Neutrophils	-0.171	<0.001	-0.211	<0.001
ALKBH3	NK CD56bright cells	0.060	0.177	0.063	0.161
ALKBH3	NK CD56dim cells	-0.049	0.269	-0.059	0.190
ALKBH3	NK cells	-0.106	0.018	-0.125	0.005
ALKBH3	pDC	0.017	0.699	-0.042	0.348
ALKBH3	T cells	-0.121	0.007	-0.120	0.007
ALKBH3	T helper cells	-0.197	<0.001	-0.114	0.011
ALKBH3	Tcm	-0.210	<0.001	-0.165	<0.001
ALKBH3	Tem	-0.089	0.047	-0.129	0.004
ALKBH3	TFH	-0.221	<0.001	-0.240	<0.001
ALKBH3	Tgd	-0.004	0.921	0.044	0.321
ALKBH3	Th1 cells	-0.136	0.002	-0.131	0.003
ALKBH3	Th17 cells	-0.066	0.139	-0.087	0.051
ALKBH3	Th2 cells	-0.059	0.190	-0.012	0.792
ALKBH3	TReg	-0.163	<0.001	-0.159	<0.001
