# Supplementary material for: N1-Methyladenosine (m1A) Regulator-Mediated Methylation Modification Modes and Tumor Microenvironment Infiltration Characteristics in Head and Neck Squamous Cell Carcinomas
Source: Preprints.org preprint supplement (doi:10.20944/preprints202111.0004.v1), 2021-11-01
Supplement: Supplementary file 7 [file Table S5.xlsx]

## Sheet: Sheet 1
Table S5. The correlation analysis between TRMT6 expression and immune cell.
Gene	immune cell	correlation coefficient(Pearson)	P-value(Pearson)	correlation coefficient(Spearman)	P-value(Spearman)
TRMT6	aDC	-0.094	0.036	-0.117	0.009
TRMT6	B cells	-0.069	0.122	-0.046	0.302
TRMT6	CD8 T cells	-0.078	0.081	-0.080	0.073
TRMT6	Cytotoxic cells	-0.218	<0.001	-0.217	<0.001
TRMT6	DC	-0.163	<0.001	-0.176	<0.001
TRMT6	Eosinophils	-0.052	0.247	-0.072	0.105
TRMT6	iDC	-0.227	<0.001	-0.239	<0.001
TRMT6	Macrophages	-0.119	0.008	-0.128	0.004
TRMT6	Mast cells	-0.112	0.012	-0.104	0.020
TRMT6	Neutrophils	-0.183	<0.001	-0.179	<0.001
TRMT6	NK CD56bright cells	0.036	0.426	0.019	0.672
TRMT6	NK CD56dim cells	-0.195	<0.001	-0.197	<0.001
TRMT6	NK cells	-0.120	0.007	-0.123	0.006
TRMT6	pDC	-0.198	<0.001	-0.176	<0.001
TRMT6	T cells	-0.178	<0.001	-0.179	<0.001
TRMT6	T helper cells	0.121	0.007	0.075	0.093
TRMT6	Tcm	0.045	0.309	0.023	0.600
TRMT6	Tem	-0.093	0.037	-0.100	0.026
TRMT6	TFH	-0.136	0.002	-0.168	<0.001
TRMT6	Tgd	-0.001	0.991	0.024	0.584
TRMT6	Th1 cells	-0.159	<0.001	-0.141	0.002
TRMT6	Th17 cells	-0.175	<0.001	-0.188	<0.001
TRMT6	Th2 cells	0.113	0.012	0.118	0.008
TRMT6	TReg	-0.128	0.004	-0.148	<0.001
