# Supplementary material for: N1-Methyladenosine (m1A) Regulator-Mediated Methylation Modification Modes and Tumor Microenvironment Infiltration Characteristics in Head and Neck Squamous Cell Carcinomas
Source: Preprints.org preprint supplement (doi:10.20944/preprints202111.0004.v1), 2021-11-01
Supplement: Supplementary file 8 [file Table S6.xlsx]

## Sheet: Sheet 1
Table S6. The correlation analysis between YTHDF2 expression and immune cell.
Gene	immune cell	correlation coefficient(Pearson)	P-value(Pearson)	correlation coefficient(Spearman)	P-value(Spearman)
YTHDF2	aDC	0.094	0.034	0.089	0.046
YTHDF2	B cells	0.043	0.338	0.060	0.178
YTHDF2	CD8 T cells	-0.014	0.762	-0.024	0.585
YTHDF2	Cytotoxic cells	-0.026	0.565	-0.018	0.690
YTHDF2	DC	-0.171	<0.001	-0.144	0.001
YTHDF2	Eosinophils	-0.084	0.060	-0.086	0.054
YTHDF2	iDC	-0.239	<0.001	-0.199	<0.001
YTHDF2	Macrophages	-0.209	<0.001	-0.161	<0.001
YTHDF2	Mast cells	-0.112	0.012	-0.092	0.040
YTHDF2	Neutrophils	-0.146	0.001	-0.138	0.002
YTHDF2	NK CD56bright cells	-0.027	0.545	-0.027	0.548
YTHDF2	NK CD56dim cells	0.024	0.587	0.047	0.291
YTHDF2	NK cells	-0.084	0.059	-0.077	0.086
YTHDF2	pDC	-0.239	<0.001	-0.203	<0.001
YTHDF2	T cells	0.031	0.485	0.035	0.428
YTHDF2	T helper cells	0.324	<0.001	0.283	<0.001
YTHDF2	Tcm	0.120	0.007	0.108	0.015
YTHDF2	Tem	-0.088	0.050	-0.070	0.118
YTHDF2	TFH	-0.009	0.834	0.001	0.975
YTHDF2	Tgd	-0.003	0.953	0.003	0.940
YTHDF2	Th1 cells	-0.053	0.235	-0.040	0.368
YTHDF2	Th17 cells	0.068	0.126	0.088	0.048
YTHDF2	Th2 cells	0.202	<0.001	0.186	<0.001
YTHDF2	TReg	-0.026	0.557	-0.024	0.593
