# Supplementary material for: N1-Methyladenosine (m1A) Regulator-Mediated Methylation Modification Modes and Tumor Microenvironment Infiltration Characteristics in Head and Neck Squamous Cell Carcinomas
Source: Preprints.org preprint supplement (doi:10.20944/preprints202111.0004.v1), 2021-11-01
Supplement: Supplementary file 9 [file Table S7.xlsx]

## Sheet: GO
Table S7. The detailed GO analysis results
ONTOLOGY	ID	Description	GeneRatio	BgRatio	pvalue	p.adjust	qvalue	geneID	Count
BP	GO:0030098	lymphocyte differentiation	12/122	368/18866	4.7993e-06	0.00768024	0.00711672	CD79B/LY9/SLAMF6/VCAM1/MYB/POU2AF1/CCL19/CD79A/CD19/PLA2G2D/MS4A1/NKX2-3	12
BP	GO:0042113	B cell activation	11/122	328/18866	9.35675e-06	0.00768024	0.00711672	TBC1D10C/CD79B/TNFRSF13B/VCAM1/LAX1/POU2AF1/CD79A/CD19/MS4A1/BLK/NKX2-3	11
BP	GO:0043367	CD4-positive, alpha-beta T cell differentiation	6/122	78/18866	1.13501e-05	0.00768024	0.00711672	LY9/SLAMF6/MYB/CCL19/PLA2G2D/NKX2-3	6
BP	GO:0030183	B cell differentiation	7/122	137/18866	3.05398e-05	0.0152213	0.0141045	CD79B/VCAM1/POU2AF1/CD79A/CD19/MS4A1/NKX2-3	7
BP	GO:0035710	CD4-positive, alpha-beta T cell activation	6/122	97/18866	3.95166e-05	0.0152213	0.0141045	LY9/SLAMF6/MYB/CCL19/PLA2G2D/NKX2-3	6
BP	GO:0050851	antigen receptor-mediated signaling pathway	10/122	325/18866	5.02482e-05	0.0152213	0.0141045	CD79B/SKAP1/CD247/LAX1/CD79A/CD19/MS4A1/BTNL9/BLK/VTCN1	10
BP	GO:0046632	alpha-beta T cell differentiation	6/122	106/18866	6.50699e-05	0.0152213	0.0141045	LY9/SLAMF6/MYB/CCL19/PLA2G2D/NKX2-3	6
BP	GO:0002429	immune response-activating cell surface receptor signaling pathway	12/122	481/18866	6.74835e-05	0.0152213	0.0141045	CD79B/SKAP1/CD247/LAX1/CD79A/CD19/MS4A1/BTNL9/BLK/MUC4/MUC21/VTCN1	12
BP	GO:0002757	immune response-activating signal transduction	12/122	481/18866	6.74835e-05	0.0152213	0.0141045	CD79B/SKAP1/CD247/LAX1/CD79A/CD19/MS4A1/BTNL9/BLK/MUC4/MUC21/VTCN1	12
BP	GO:0046651	lymphocyte proliferation	9/122	283/18866	9.4136e-05	0.0188213	0.0174403	TNFRSF13B/VCAM1/CCL19/CD79A/CD19/PLA2G2D/MS4A1/BLK/VTCN1	9
BP	GO:0032943	mononuclear cell proliferation	9/122	286/18866	0.000101987	0.0188213	0.0174403	TNFRSF13B/VCAM1/CCL19/CD79A/CD19/PLA2G2D/MS4A1/BLK/VTCN1	9
BP	GO:0009404	toxin metabolic process	3/122	15/18866	0.00011342	0.0191868	0.017779	CYP1B1/TH/FMO2	3
BP	GO:0070661	leukocyte proliferation	9/122	313/18866	0.00020083	0.0312636	0.0289697	TNFRSF13B/VCAM1/CCL19/CD79A/CD19/PLA2G2D/MS4A1/BLK/VTCN1	9
BP	GO:0002285	lymphocyte activation involved in immune response	7/122	187/18866	0.000215611	0.0312636	0.0289697	LY9/SLAMF6/MYB/POU2AF1/CCL19/CD19/NKX2-3	7
BP	GO:0001894	tissue homeostasis	8/122	261/18866	0.000298411	0.0403849	0.0374218	TMEM119/TJP3/MUC4/CNGB1/LTF/CLDN3/KRT1/TFF3	8
BP	GO:0046631	alpha-beta T cell activation	6/122	146/18866	0.000374964	0.0475736	0.044083	LY9/SLAMF6/MYB/CCL19/PLA2G2D/NKX2-3	6
BP	GO:0042100	B cell proliferation	5/122	97/18866	0.000417571	0.0498629	0.0462043	TNFRSF13B/CD79A/CD19/MS4A1/BLK	5
BP	GO:0051250	negative regulation of lymphocyte activation	6/122	154/18866	0.00049797	0.0539098	0.0499543	TBC1D10C/TNFRSF13B/LAX1/PLA2G2D/BLK/VTCN1	6
BP	GO:0019748	secondary metabolic process	4/122	57/18866	0.000504574	0.0539098	0.0499543	CYP1B1/TH/FMO2/OCA2	4
MF	GO:0004497	monooxygenase activity	8/119	101/18352	3.01373e-07	8.43845e-05	7.51847e-05	PTGIS/CYP1B1/TH/CYP2E1/NOS2/CYP11A1/FMO2/CYP26A1	8
MF	GO:0005506	iron ion binding	8/119	151/18352	6.3263e-06	0.000885682	0.000789123	CDO1/PTGIS/CYP1B1/TH/CYP2E1/CYP11A1/LTF/CYP26A1	8
MF	GO:0016705	oxidoreductase activity, acting on paired donors, with incorporation or reduction of molecular oxygen	8/119	162/18352	1.06031e-05	0.00098962	0.000881729	PTGIS/CYP1B1/TH/CYP2E1/NOS2/CYP11A1/FMO2/CYP26A1	8
MF	GO:0005201	extracellular matrix structural constituent	8/119	169/18352	1.44304e-05	0.00101013	0.000900003	ELN/PRELP/COL4A4/PODN/ABI3BP/COL4A6/MUC4/CILP	8
MF	GO:0019825	oxygen binding	4/119	36/18352	8.43249e-05	0.00472219	0.00420737	CYP1B1/TH/CYP2E1/CYP26A1	4
MF	GO:0005539	glycosaminoglycan binding	8/119	232/18352	0.000135932	0.00634349	0.00565191	SPOCK2/PRELP/SELP/ABI3BP/PLA2G2D/EPYC/LTF/THBS4	8
MF	GO:0016709	oxidoreductase activity, acting on paired donors, with incorporation or reduction of molecular oxygen, NAD(P)H as one donor, and incorporation of one atom of oxygen	4/119	45/18352	0.000203914	0.00815657	0.00726732	CYP2E1/NOS2/FMO2/CYP26A1	4
MF	GO:0020037	heme binding	6/119	138/18352	0.000280506	0.0098177	0.00874735	PTGIS/CYP1B1/CYP2E1/NOS2/CYP11A1/CYP26A1	6
MF	GO:0046906	tetrapyrrole binding	6/119	148/18352	0.000408084	0.012696	0.0113118	PTGIS/CYP1B1/CYP2E1/NOS2/CYP11A1/CYP26A1	6
MF	GO:0008201	heparin binding	6/119	169/18352	0.000821039	0.0229891	0.0204828	PRELP/SELP/ABI3BP/PLA2G2D/LTF/THBS4	6
MF	GO:0008395	steroid hydroxylase activity	3/119	38/18352	0.00190052	0.0483769	0.0431027	CYP1B1/CYP2E1/CYP11A1	3
