# Supplementary material for: N1-Methyladenosine (m1A) Regulator-Mediated Methylation Modification Modes and Tumor Microenvironment Infiltration Characteristics in Head and Neck Squamous Cell Carcinomas
Source: Preprints.org preprint supplement (doi:10.20944/preprints202111.0004.v1), 2021-11-01
Supplement: Supplementary file 10 [file Table S8.xlsx]

## Sheet: Sheet1
Table S8. The detailed KEGG analysis results
ID	Description	GeneRatio	BgRatio	pvalue	p.adjust	qvalue	geneID	Count
hsa05132	Salmonella infection	165/4075	249/8098	1.78644e-07	5.25557e-05	3.52655e-05	HSP90AA1/CSE1L/ACTR10/MYC/EXOC5/PKN1/DYNC1H1/CYFIP2/CDC42/TUBA1C/BCL2/RELA/DYNC1I2/NCKAP1L/TUBB/AHNAK2/CYTH4/HSP90AB1/MAP3K7/KLC1/AKT1/ARPC1A/KPNA4/PIK3CG/CYCS/NCKAP1/MAP2K4/HRAS/TLR5/VPS33A/BAK1/KIF5B/KIF5C/RHOH/KPNA3/TUBA4A/DCTN5/RAB7A/TLR9/IRAK1/KIF5A/TUBB6/ELMO1/CHUK/TXN/DYNLL1/PAK3/ARF1/S100A10/RAB5C/ANXA2/ACTR3/MAPK14/PTPRC/CYFIP1/PFN1/FHOD1/ACTR2/ARPC3/DCTN6/FADD/TLR4/MAP2K6/WASL/GAPDH/DCT…	165
hsa05222	Small cell lung cancer	70/4075	92/8098	3.17557e-07	5.25557e-05	3.52655e-05	MYC/COL4A4/BCL2/RELA/ITGA6/RARB/PTK2/COL4A6/CDK6/AKT1/NOS2/CYCS/COL4A3/BAK1/TRAF5/TRAF3/COL4A5/SKP2/LAMC2/CHUK/ITGA3/CKS2/FHIT/LAMB3/ITGB1/TRAF1/GADD45G/AKT3/RXRA/CDKN1B/PIK3R1/LAMA3/BIRC3/RB1/CCNE2/LAMB2/CDKN1A/MAX/TRAF6/CKS1B/NFKBIA/TRAF4/E2F3/XIAP/PIK3R3/LAMA5/E2F2/GADD45A/CCNE1/CASP9/BIRC2/ITGA2B/BCL2L1/CDK2/IKBKB/PTGS2/NFKB1/LAMA2/CCND1/ITGAV/COL4A1/LAMC1/GADD45B/LAMA4/PTEN/IKBKG/TRAF2/TP53/…	70
hsa04064	NF-kappa B signaling pathway	76/4075	104/8098	1.62629e-06	0.000179434	0.000120403	CSNK2A1/CSNK2A2/LTB/VCAM1/BCL2/RELA/LTA/TNFRSF13C/BCL10/CCL19/BTK/CARD10/MAP3K7/ZAP70/LCK/PRKCB/LAT/TNFRSF11A/CD40LG/CXCL12/TRAF5/TRAF3/IRAK1/CHUK/TNFSF14/TRAF1/TNFSF11/TLR4/GADD45G/TNFRSF1A/TNFSF13B/BIRC3/CD14/CD40/RELB/TRAF6/CARD11/DDX58/MAP3K14/UBE2I/NFKBIA/ERC1/TRIM25/XIAP/LTBR/CFLAR/GADD45A/PLCG2/TICAM2/BIRC2/CCL13/BCL2L1/BLNK/BCL2A1/IKBKB/PTGS2/LY96/NFKB1/TICAM1/MYD88/CYLD/CSNK2B/IL1B/IL1R1…	76
hsa04151	PI3K-Akt signaling pathway	220/4075	354/8098	3.12966e-06	0.000258979	0.000173778	HSP90AA1/YWHAB/PPP2R5E/YWHAZ/MYC/GNG7/NRAS/PKN1/PPP2R5C/COL4A4/BCL2/RELA/MYB/ITGA6/SOS2/ITGA10/IL3RA/CD19/GNB3/PTK2/FGF18/IL2RG/HSP90AB1/GNG12/KIT/YWHAG/RPTOR/COL4A6/CDK6/AKT1/FLT3/CSF1R/PIK3R6/IRS1/PIK3CG/YWHAQ/IGF1/COL9A2/PDGFRA/FLT3LG/ITGB7/HRAS/COL4A3/ATF6B/EIF4E/CSF3R/MET/PDGFD/GNB1/TGFA/ITGA9/PIK3AP1/MAGI2/COL4A5/MCL1/HGF/LAMC2/CHUK/ITGA3/IL2RB/THBS4/NGF/OSMR/YWHAE/PPP2R2D/GNG5/LAMB3/PPP2R1…	220
hsa04514	Cell adhesion molecules	102/4075	149/8098	4.61077e-06	0.000298175	0.000200079	HLA-DMA/VCAM1/ITGB2/ICAM2/ITGA6/CD4/SELP/HLA-DOA/HLA-DMB/ICAM3/ITGAL/HLA-DPB1/CD6/CLDN5/JAM2/CLDN11/CD2/LRRC4B/CLDN10/ITGAM/CD22/SELL/PECAM1/CD40LG/ITGB7/CD28/CD226/HLA-DPA1/CD58/ITGA9/NRXN2/CLDN3/NLGN1/MPZL1/ESAM/ITGB1/ICOSLG/SPN/PVR/SDC1/ITGA8/HLA-DOB/PDCD1/PTPRM/CDH3/CLDN15/PTPRC/SDC4/CD34/CD8A/CADM1/VTCN1/CLDN14/TIGIT/SELPLG/LRRC4C/JAM3/HLA-DRA/CD8B/ICOS/CLDN18/NRXN1/NCAM2/CD99L2/HLA-DRB5/CD4…	102
hsa04810	Regulation of actin cytoskeleton	142/4075	218/8098	5.43926e-06	0.000298175	0.000200079	NRAS/ACTN1/CYFIP2/CDC42/SPATA13/ITGB2/PXN/RRAS2/ITGA6/NCKAP1L/SOS2/VAV1/ITGA10/CRK/PTK2/FGF18/PIP4K2C/ITGAL/GNG12/ARHGEF6/CXCR4/ARPC1A/ITGAM/ITGAX/SLC9A1/NCKAP1/PDGFRA/ITGB7/HRAS/GNA12/BDKRB1/FGD3/PDGFD/CXCL12/ITGA9/MSN/ITGAD/BDKRB2/MRAS/BCAR1/ITGA3/MYH9/PAK3/PIP5K1B/ITGB1/EZR/FGF2/EGFR/ITGA8/IQGAP2/ACTR3/LIMK2/MYH11/SSH3/SCIN/RDX/CYFIP1/PFN1/ITGAE/MYH14/ACTR2/PPP1CC/ARPC3/CRKL/VAV2/WASL/FGFR1/LP…	142
hsa04010	MAPK signaling pathway	185/4075	294/8098	6.30581e-06	0.000298175	0.000200079	MAP4K1/CACNA2D4/MYC/NRAS/CDC42/RASGRP2/HSPA8/CACNA2D2/RPS6KA4/MAP3K12/RRAS2/RELA/SOS2/STK3/CRK/CDC25B/FGF18/GNG12/MAP3K7/KIT/HSPA2/MAP4K4/PTPN7/PPM1A/PRKCB/AKT1/FLT3/CSF1R/IGF1/RASGRP3/CACNA1D/MAP2K4/PDGFRA/FLT3LG/CACNB4/HRAS/GNA12/CACNA1F/DUSP6/MET/PDGFD/TGFA/IRAK1/MRAS/HGF/CHUK/DUSP7/CACNA1I/NGF/CACNB2/FGF2/EGFR/PLA2G4C/PTPN5/CACNA1C/ARRB1/MAPK14/IL1A/EREG/VEGFC/TGFBR1/CRKL/IL1RAP/GADD45G/MAP2K…	185
hsa05235	PD-L1 expression and PD-1 checkpoint pathway in cancer	65/4075	89/8098	9.51269e-06	0.000360842	0.000242129	CSNK2A1/NRAS/HIF1A/CSNK2A2/CD247/RELA/PTPN6/CD4/ZAP70/LCK/AKT1/LAT/BATF3/HRAS/CD28/TLR9/CD3G/CHUK/BATF/CD3D/PTPN11/EGFR/CD3E/PDCD1/IFNGR1/MAPK14/TLR4/MAP2K6/NFKBIE/PPP3CA/MAP2K1/AKT3/PPP3R1/PIK3R1/MAPK1/JAK1/ALK/JUN/TRAF6/STAT1/NFATC1/RASGRP1/NFKBIA/JAK2/PIK3R3/TICAM2/FOS/MAP2K3/IFNG/IKBKB/NFKB1/RPS6KB1/IFNGR2/TICAM1/MYD88/CD274/CSNK2B/PLCG1/PPP3CC/MAP3K3/PTEN/IKBKG/EML4/MAP2K2/PIK3CD	65
hsa05130	Pathogenic Escherichia coli infection	129/4075	197/8098	9.8114e-06	0.000360842	0.000242129	TMED10/CYFIP2/CDC42/MYO1F/TUBA1C/NCL/MYO1B/RELA/NCKAP1L/PTPN6/TUBB/CYTH4/MAP3K7/HCLS1/CLDN5/CLDN11/WIPF1/ABCF2/ARPC1A/CLDN10/CYCS/NCKAP1/MYO5C/MYO10/GNA12/TLR5/FYN/MYO5A/BAK1/TUBA4A/CLDN3/IRAK1/RAB1A/SEC24B/TUBB6/CHUK/MYH9/PAK3/PTPN11/ARF1/ITGB1/EZR/ARHGEF2/ACTR3/MYH11/MAPK14/CLDN15/CYFIP1/MYH14/ACTR2/CLDN14/ARPC3/FADD/TLR4/WASL/GAPDH/TNFRSF1A/TMBIM6/LPAR4/TUBA1B/CYTH3/SRC/CASP4/MYO1E/MYO1G/BAIAP…	129
hsa04144	Endocytosis	160/4075	252/8098	1.285e-05	0.000425335	0.000285405	RAB22A/CDC42/ACAP1/HSPA8/SNX12/VTA1/CAV1/CAV2/SNX5/VPS35/CYTH4/CLTC/IL2RG/VPS25/HSPA2/CXCR4/WIPF1/ARPC1A/FOLR3/ARFGEF1/PDGFRA/HRAS/CAPZA1/KIF5B/SPG21/KIF5C/SNX6/STAMBP/TSG101/RAB7A/ZFYVE9/KIF5A/CHMP1A/STAM/IL2RB/WWP1/NEDD4/ARF1/PIP5K1B/RAB5C/RAB10/EGFR/HGS/ACTR3/IQSEC3/LDLR/ARRB1/VPS26A/DAB2/SNX3/ARF4/ARFGEF2/ACTR2/TGFBR1/ARPC3/FOLR2/SH3GL2/WASL/IQSEC1/PRKCZ/EEA1/AP2M1/CYTH3/STAM2/AP2A1/SRC/GRK4/…	160
hsa03013	Nucleocytoplasmic transport	76/4075	109/8098	2.75858e-05	0.000830083	0.000556996	RAN/CSE1L/RAE1/KPNB1/DDX19A/TMEM33/IPO7/XPO5/NUP98/NUP37/NUP54/IPO5/XPO6/NUP210/KPNA4/EIF4A3/KPNA6/NMD3/IPO4/MAGOH/KPNA3/XPOT/SUMO2/RANBP2/NUP35/NUP93/NUP50/NCBP2/NXT1/NUP107/PNN/SEH1L/NCBP1/RNPS1/NUP153/NUP155/NUP160/EEF1A1/KPNA1/XPO1/IPO13/PHAX/SUMO3/NUP85/IPO9/SUMO1/RANGAP1/ACIN1/UBE2I/NXF1/TNPO3/NUP188/NUP205/AHCTF1/GLE1/XPO7/TNPO1/KPNA7/UPF1/SRRM1/TNPO2/IPO8/NUP88/SENP2/NXT2/UPF2/THOC2/CASC3…	76
hsa05166	Human T-cell leukemia virus 1 infection	141/4075	222/8098	4.05997e-05	0.00102837	0.000690049	RAN/MYC/NRAS/HLA-DMA/ITGB2/RELA/FOSL1/LTA/CD4/TNFRSF13C/ADCY6/HLA-DOA/STAT5A/HLA-DMB/IL2RG/ITGAL/HLA-DPB1/ADCY5/LCK/SLC25A5/TBP/AKT1/SPI1/MAP2K4/HRAS/BUB3/ATF6B/VDAC1/HLA-DPA1/RANBP1/CD3G/CHUK/CD3D/ADCY4/IL2RB/SLC2A1/CCNA2/CHEK1/HLA-DOB/CD3E/VAC14/CDC20/SLC25A4/NFATC4/ANAPC10/TGFBR1/CALR/PPP3CA/TNFRSF1A/KAT5/MAP2K1/XPO1/AKT3/PPP3R1/HLA-DRA/VDAC2/IL2RA/PIK3R1/ANAPC13/EGR2/MMP7/RB1/CCNE2/MAPK1/BUB1…	141
hsa04510	Focal adhesion	129/4075	201/8098	4.20263e-05	0.00102837	0.000690049	PARVG/ACTN1/CDC42/COL4A4/BCL2/PXN/CAV1/ITGA6/CAV2/SOS2/VAV1/ITGA10/CRK/PTK2/COL4A6/PRKCB/AKT1/IGF1/COL9A2/PDGFRA/ITGB7/HRAS/COL4A3/FYN/SHC1/MET/PDGFD/ITGA9/COL4A5/BCAR1/HGF/LAMC2/ITGA3/THBS4/PAK3/PIP5K1B/LAMB3/ITGB1/EGFR/SHC2/ITGA8/VWF/COL9A1/VEGFC/GSK3B/COL6A6/PPP1CC/CRKL/VAV2/ITGA11/VASP/MAP2K1/AKT3/SRC/ARHGAP5/MYL5/PIK3R1/RAC1/LAMA3/FLNA/BIRC3/PPP1CB/MAPK1/PDGFA/LAMB2/MYL9/TNN/JUN/TNC/THBS3/PG…	129
hsa05135	Yersinia infection	92/4075	137/8098	4.3496e-05	0.00102837	0.000690049	PKN1/CDC42/PXN/RELA/VAV1/CD4/CRK/PTK2/WAS/MAP3K7/ZAP70/LCK/AKT1/WIPF1/LAT/ARPC1A/MAP2K4/IRAK1/ELMO1/BCAR1/CHUK/PIP5K1B/ITGB1/ACTR3/MAPK14/CD8A/GSK3B/ACTR2/ARPC3/TLR4/CRKL/VAV2/MAP2K6/WASL/MAP2K1/AKT3/SRC/CD8B/NLRC4/PIK3R1/RAC1/PKN2/ARPC5L/LCP2/MAPK1/IL10/BAIAP2/JUN/TRAF6/PIP5K1A/NFATC1/NFKBIA/RPS6KA1/WIPF2/ITGA4/RAC3/PIK3R3/ROCK1/RPS6KA2/GNAQ/FOS/ARPC2/LIMK1/ITGA5/WASF2/MAP2K3/RHOG/CASP1/IKBKB/AR…	92
hsa04662	B cell receptor signaling pathway	59/4075	82/8098	5.10376e-05	0.00112623	0.000755715	CD79B/NRAS/INPP5D/RELA/LILRB1/PTPN6/SOS2/VAV1/BCL10/BTK/CD79A/CD19/PRKCB/AKT1/RASGRP3/CD22/HRAS/LILRB4/PIK3AP1/CR2/CHUK/LILRA2/LILRB3/GSK3B/VAV2/NFKBIE/PPP3CA/CD72/MAP2K1/AKT3/PPP3R1/PIK3R1/RAC1/LILRB2/MAPK1/LILRB5/JUN/LILRA5/CARD11/LILRA4/NFATC1/NFKBIA/RAC3/PIK3R3/LILRA6/PLCG2/FOS/BLNK/IKBKB/GRB2/NFKB1/CD81/MALT1/VAV3/SYK/PPP3CC/IKBKG/MAP2K2/PIK3CD	59
hsa05215	Prostate cancer	68/4075	97/8098	5.50363e-05	0.00113856	0.000763991	HSP90AA1/NRAS/BCL2/RELA/SOS2/TMPRSS2/HSP90AB1/AKT1/GSTP1/IGF1/PDGFRA/HRAS/AR/PDGFD/TGFA/CHUK/EGFR/MMP3/GSK3B/FGFR1/MAP2K1/LEF1/AKT3/CDKN1B/PIK3R1/RB1/CCNE2/MAPK1/PDGFA/HSP90B1/CDKN1A/IGF1R/NFKBIA/CREB3L4/ZEB1/E2F3/PIK3R3/E2F2/PLAT/CCNE1/CASP9/ETV5/PDGFC/PDGFRB/EP300/PDPK1/CDK2/ATF4/IKBKB/GRB2/NFKB1/FOXO1/CREB1/CCND1/ERG/CREBBP/CTNNB1/CREB3/SRD5A2/ERBB2/FGFR2/PTEN/IKBKG/MAP2K2/TP53/PIK3CD/CREB3L2/…	68
hsa04660	T cell receptor signaling pathway	72/4075	104/8098	6.47016e-05	0.00125978	0.000845328	NRAS/CDC42/CD247/RELA/PTPN6/SOS2/VAV1/CD4/GRAP2/BCL10/ITK/MAP3K7/ZAP70/LCK/AKT1/LAT/CD40LG/HRAS/CD28/FYN/CD3G/CHUK/CD3D/PAK3/CD3E/PDCD1/MAPK14/PTPRC/CD8A/GSK3B/VAV2/NFKBIE/PPP3CA/MAP2K1/AKT3/PPP3R1/CD8B/ICOS/PIK3R1/LCP2/MAPK1/IL10/JUN/CARD11/MAP3K14/NFATC1/PAK1/CTLA4/RASGRP1/NFKBIA/MAP3K8/PAK2/PIK3R3/FOS/CSF2/NCK2/PDPK1/IFNG/IKBKB/GRB2/PAK6/NFKB1/DLG1/PLCG1/MAP2K7/MALT1/VAV3/PPP3CC/IKBKG/MAP2K2/P…	72
hsa04380	Osteoclast differentiation	86/4075	128/8098	7.44458e-05	0.00136898	0.0009186	RELA/FOSL1/LILRB1/BTK/TYROBP/MAP3K7/LCK/AKT1/CSF1R/SPI1/PPARG/TNFRSF11A/NCF4/FYN/LILRB4/FHL2/CYBA/CHUK/SIRPG/CAMK4/IFNGR1/LILRA2/MAPK14/IL1A/OSCAR/TNFSF11/LILRB3/TGFBR1/MAP2K6/MITF/PPP3CA/TNFRSF1A/MAP2K1/AKT3/PPP3R1/PIK3R1/RAC1/LILRB2/LCP2/MAPK1/JUND/TYK2/JAK1/LILRB5/RELB/JUN/TRAF6/LILRA5/STAT1/LILRA4/MAP3K14/NFATC1/CTSK/NFKBIA/SIRPB1/PIK3R3/LILRA6/GAB2/PLCG2/FOS/BLNK/SIRPA/IFNG/IKBKB/GRB2/CSF1/N…	86
hsa03050	Proteasome	36/4075	46/8098	8.90518e-05	0.00155138	0.00104099	PSMA3/PSMC6/PSME3/PSMA6/PSMD7/PSMB2/PSMD14/PSMD12/PSMC1/PSMB5/PSMA1/ADRM1/PSMD1/PSMC2/PSMF1/PSMD11/PSMA7/PSMD2/PSMD13/PSMB7/PSMB1/POMP/PSMD3/PSMA4/PSMA5/PSMD6/PSMD9/PSME4/PSMC3/PSMB6/PSMB3/PSMB4/PSMD4/PSMC5/IFNG/PSME2	36
hsa04640	Hematopoietic cell lineage	68/4075	99/8098	0.000150027	0.00248294	0.00166609	CD37/HLA-DMA/CD44/IL11RA/CD5/ITGA6/CD4/IL3RA/CSF2RA/CD33/HLA-DOA/HLA-DMB/CD19/HLA-DPB1/KIT/MS4A1/FCER2/CD2/FLT3/CSF1R/ITGAM/CD22/FLT3LG/CD1E/HLA-DPA1/CSF3R/CD7/CR2/CD1D/CD3G/CD59/ITGA3/CD3D/GP1BA/CR1/HLA-DOB/CD3E/CD34/IL1A/CD1C/CD8A/HLA-DRA/CD8B/IL2RA/IL5RA/CD1B/CD14/EPO/HLA-DRB5/HLA-DRB1/CD38/ITGA4/CSF2/ITGA2B/ITGA5/HLA-DQA2/CSF1/IL11/IL4R/CD1A/ITGB3/IL1B/IL1R1/TFRC/IL6R/ITGA1/ITGA2/CSF3	68
hsa05169	Epstein-Barr virus infection	127/4075	202/8098	0.000185617	0.00292567	0.00196316	SNW1/MYC/PSMC6/HLA-DMA/CD44/PSMD7/CD247/PSMD14/PSMD12/BCL2/PSMC1/RELA/BTK/HLA-DOA/HLA-DMB/CD19/ADRM1/ITGAL/MAP3K7/HLA-DPB1/FCER2/CDK6/AKT1/PSMD1/ENTPD1/PSMC2/PSMD11/CYCS/PSMD2/MAP2K4/PSMD13/HLA-DPA1/BAK1/TRAF5/CD58/TRAF3/IRAK1/CR2/CD3G/SKP2/CHUK/CD3D/HDAC1/CCNA2/NEDD4/PSMD3/HLA-DOB/CD3E/MAPK14/RUNX3/PSMD6/FADD/GADD45G/MAP2K6/PSMC3/CALR/NFKBIE/USP7/IKBKE/AKT3/HLA-DRA/CDKN1B/PIK3R1/RAC1/RB1/CCNE2/T…	127
hsa04152	AMPK signaling pathway	80/4075	120/8098	0.00019531	0.00293853	0.00197179	PPP2R5E/RAB2A/ACACB/PPP2R5C/CAB39/MAP3K7/FBP1/RPTOR/AKT1/IRS1/IGF1/PPARG/PFKFB2/RAB14/ADIPOR1/CCNA2/PPP2R2D/PPP2R1B/RAB10/PPP2R2B/PPP2R2C/SCD/GYS1/PPP2CB/AKT3/FASN/PPP2R1A/PIK3R1/PPP2R5D/HMGCR/PRKAB2/EEF2/PPP2R5B/LIPE/EIF4EBP1/CCNA1/RAB8A/IGF1R/INSR/PRKAA2/PRKAG1/CAMKK2/PPP2R3A/CREB3L4/RHEB/FBP2/G6PC3/PFKM/CFTR/PIK3R3/PCK1/PRKAA1/CPT1C/ACACA/ADIPOR2/PDPK1/PPP2R3B/CAB39L/PRKAG2/ELAVL1/LEP/ADIPOQ/S…	80
hsa03015	mRNA surveillance pathway	67/4075	98/8098	0.000207937	0.00299248	0.00200799	PPP2R5E/GSPT1/CPSF2/CLP1/PAPOLA/DDX19A/PPP2R5C/CSTF1/PABPC1/NUDT21/TARDBP/EIF4A3/CSTF2/MAGOH/PABPC4/FUS/NCBP2/NXT1/PPP2R2D/PPP2R1B/PNN/NCBP1/SMG5/RNPS1/PPP2R2B/CPSF6/PPP1CC/PPP2R2C/WDR33/PPP2CB/ETF1/PPP2R1A/CSTF3/FIP1L1/SMG1/PPP1CB/CPSF3/PPP2R5D/PABPC5/PPP2R5B/SSU72/RNMT/GSPT2/ACIN1/NXF1/PABPN1/PPP2R3A/CPSF1/GLE1/MSI1/SMG7/UPF1/SRRM1/PABPC4L/PPP2R3B/DAZAP1/NXT2/UPF2/HBS1L/MSI2/RNGTT/PELO/CASC3/UP…	67
hsa04210	Apoptosis	89/4075	136/8098	0.000236422	0.00326066	0.00218794	EIF2S1/NRAS/TUBA1C/BCL2/RELA/IL3RA/AKT1/LMNB2/CTSC/CYCS/CTSH/HRAS/BAK1/DFFA/TUBA4A/CTSS/CTSW/MCL1/CHUK/CSF2RB/NGF/BBC3/AIFM1/TRAF1/FADD/CTSF/GADD45G/TNFRSF1A/TUBA1B/MAP2K1/AKT3/PIK3R1/BIRC3/MAPK1/DAB2IP/ITPR1/DIABLO/PARP2/JUN/LMNA/TP53AIP1/DAXX/TNFRSF10A/MAP3K14/PRF1/DFFB/HTRA2/CTSK/NFKBIA/CAPN2/CTSO/XIAP/FASLG/ITPR3/TUBA8/CAPN1/CFLAR/PIK3R3/CASP7/GADD45A/FOS/CASP9/PTPN13/BIRC2/CASP8/BIRC5/BCL2L1…	89
hsa04668	TNF signaling pathway	75/4075	112/8098	0.000248009	0.00328364	0.00220336	PGAM5/VCAM1/RPS6KA4/RELA/LTA/MAP3K7/CX3CL1/DNM1L/AKT1/MAP2K4/ATF6B/TNFRSF1B/TRAF5/TRAF3/JAG1/CHUK/CEBPB/IL18R1/MAPK14/TRAF1/MMP3/VEGFC/FADD/MAP2K6/TNFRSF1A/MAP2K1/AKT3/ITCH/PIK3R1/BIRC3/MAPK1/DAB2IP/CCL5/JUN/ATF2/MAP3K14/MMP14/NFKBIA/CREB3L4/MAP3K8/IL15/CFLAR/PIK3R3/SELE/CASP7/FOS/CSF2/BCL3/BIRC2/CASP8/MAP2K3/ATF4/NOD2/IKBKB/PTGS2/CSF1/NFKB1/CREB1/JUNB/LIF/IL1B/CREB3/RIPK1/MAP2K7/TNFAIP3/ICAM1/FA…	75
hsa05142	Chagas disease	69/4075	102/8098	0.000274945	0.00337944	0.00226765	PLCB2/CD247/RELA/AKT1/GNAI1/NOS2/MAP2K4/TLR9/IRAK1/PLCB3/BDKRB2/CD3G/CHUK/CD3D/PPP2R2D/IL12A/PPP2R1B/C3/CD3E/IFNGR1/MAPK14/PPP2R2B/TGFBR1/FADD/PPP2R2C/TLR4/GNAI3/CALR/TNFRSF1A/C1QA/PLCB4/PPP2CB/AKT3/GNAS/PPP2R1A/GNA14/PIK3R1/SERPINE1/MAPK1/GNA15/IL10/CCL5/JUN/TRAF6/C1QC/CCL3/NFKBIA/C1QB/FASLG/CFLAR/PIK3R3/GNAQ/FOS/GNAL/CASP8/IFNG/IKBKB/SMAD2/NFKB1/IFNGR2/TICAM1/MYD88/PPP2R2A/IL1B/GNA11/FAS/TLR6/I…	69
hsa04360	Axon guidance	115/4075	182/8098	0.000275664	0.00337944	0.00226765	NRAS/CDC42/FES/SEMA4D/PTK2/EFNB1/SEMA3G/CXCR4/GNAI1/HRAS/CAMK2D/FYN/SRGAP3/MET/CXCL12/RND1/ROBO2/EFNB2/NTN1/PLXNC1/PAK3/PTPN11/ITGB1/SEMA6C/SLIT3/LIMK2/SEMA3C/SLIT1/SSH3/SEMA3E/SEMA6A/NFATC4/GSK3B/EPHB4/BMPR1B/GNAI3/PRKCZ/LRRC4C/PPP3CA/EPHB6/RHOD/SLIT2/EPHB1/SEMA4A/EPHA3/SRC/MYL5/PPP3R1/ENAH/PIK3R1/RAC1/DPYSL2/RGMA/MAPK1/SEMA4B/SEMA5B/WNT5B/MYL9/PAK1/ROBO1/PTCH1/BOC/NTN4/EPHA2/LRIG2/SEMA3D/TRPC3/…	115
hsa05022	Pathways of neurodegeneration - multiple diseases	275/4075	476/8098	0.000465597	0.00550402	0.00369327	EIF2S1/PSEN1/PRNP/ACTR10/PSMA3/CSNK2A1/PSMC6/NRAS/CSNK2A2/VAPB/TUBA1C/PSMA6/PLCB2/PSMD7/PSMB2/PSMD14/PSMD12/BCL2/DNAH1/PSMC1/RELA/APP/PSMB5/DERL1/ATG2B/TUBB/CALM1/PSMA1/ADRM1/ATP2A3/DVL1/NEFH/TARDBP/SLC25A5/KLC1/MAP1LC3A/PRKCB/PSMD1/PSMC2/RB1CC1/NOS2/PSMD11/CYBB/MFN2/CYCS/CACNA1D/PSMA7/PSMD2/HRAS/NDUFB9/MAP1LC3C/ZFYVE1/PSMD13/DNALI1/TNFRSF1B/CAMK2D/VDAC1/UBE2J2/CYC1/BAK1/CACNA1F/CSNK1A1/KIF5B/PSM…	275
hsa04110	Cell cycle	82/4075	126/8098	0.000533986	0.0060948	0.00408969	YWHAB/YWHAZ/MYC/PRKDC/RAD21/CDC25B/TFDP1/MCM4/YWHAG/E2F4/CDK6/YWHAQ/BUB3/SFN/SKP2/HDAC1/CCNA2/YWHAE/PCNA/BUB1/CHEK1/CDC20/ANAPC10/GSK3B/YWHAH/GADD45G/PLK1/CDKN1B/TTK/CDK7/ANAPC13/MAD2L2/RB1/CCNE2/BUB1B/SMC1B/CDKN1A/CDC16/STAG2/CDC14A/RBL1/MAD2L1/CCNB1/CCNA1/CUL1/MAD1L1/CDKN2C/CDC6/ANAPC1/E2F3/RBL2/CDKN1C/DBF4/SMC3/TFDP2/E2F2/RBX1/GADD45A/CCNE1/PKMYT1/CDC23/ANAPC4/EP300/ANAPC5/CDK2/WEE1/SMAD4/SMAD…	82
hsa04014	Ras signaling pathway	141/4075	232/8098	0.000746626	0.00823777	0.00552765	GNG7/NRAS/CDC42/RASGRP2/RRAS2/RELA/RASAL3/SOS2/PLA1A/GNB3/CALM1/FGF18/GNG12/KIT/ZAP70/PLA2G2D/PRKCB/AKT1/FLT3/CSF1R/LAT/IGF1/RASGRP3/PDGFRA/FLT3LG/HRAS/SHC1/MET/PDGFD/GNB1/TGFA/PLA2G6/MRAS/HGF/CHUK/NGF/PAK3/PTPN11/GNG5/RAB5C/FGF2/EGFR/PLA2G4C/GNGT2/SHC2/RGL1/HTR7/PLCE1/GRIN2A/VEGFC/RIN1/KSR2/FGFR1/RALB/NTRK2/MAP2K1/AKT3/CALM2/RASSF5/NTF3/ABL2/PIK3R1/RAC1/FGF1/MAPK1/TEK/ETS2/PDGFA/ANGPT1/RALA/FGF1…	141
hsa05145	Toxoplasmosis	73/4075	112/8098	0.000991705	0.0104779	0.00703082	ALOX5/HLA-DMA/HSPA8/BCL2/RELA/ITGA6/HLA-DOA/HLA-DMB/MAP3K7/HLA-DPB1/HSPA2/AKT1/GNAI1/PIK3R6/PIK3CG/NOS2/CYCS/CD40LG/HLA-DPA1/IL10RA/IRAK1/LAMC2/CHUK/IL12A/LAMB3/ITGB1/PIK3R5/HLA-DOB/LDLR/IFNGR1/MAPK14/CIITA/TLR4/MAP2K6/GNAI3/TNFRSF1A/AKT3/HLA-DRA/LAMA3/BIRC3/MAPK1/IL10/TYK2/JAK1/LAMB2/HLA-DRB5/CD40/HSPA1L/TRAF6/STAT1/HLA-DRB1/NFKBIA/PPIF/XIAP/JAK2/LAMA5/CASP9/BIRC2/CASP8/BCL2L1/HLA-DQA2/PDPK1/MAP…	73
hsa05220	Chronic myeloid leukemia	52/4075	76/8098	0.00101297	0.0104779	0.00703082	MYC/NRAS/RELA/SOS2/CRK/STAT5A/CDK6/AKT1/HRAS/SHC1/BAK1/CHUK/HDAC1/PTPN11/SHC2/TGFBR1/CRKL/GADD45G/CTBP2/MAP2K1/AKT3/CDKN1B/PIK3R1/BCR/RB1/MAPK1/CDKN1A/CBL/NFKBIA/E2F3/PIK3R3/GAB2/E2F2/GADD45A/RUNX1/BCL2L1/SMAD4/IKBKB/GRB2/NFKB1/SHC3/HDAC2/CCND1/STAT5B/GADD45B/SHC4/IKBKG/MAP2K2/TP53/PIK3CD/MDM2/CTBP1	52
hsa04919	Thyroid hormone signaling pathway	78/4075	121/8098	0.00109908	0.0110241	0.0073973	MYC/NRAS/HIF1A/NOTCH4/PLCB2/ATP1A1/ATP2A3/PRKCB/AKT1/SLC9A1/HRAS/PFKFB2/ATP1B3/ATP1B2/PLCB3/HDAC1/SLC2A1/PLCE1/MED30/PLCD4/GSK3B/RCAN2/NCOA3/NCOA2/ATP1A3/SLCO1C1/PLCB4/MAP2K1/PLCD3/AKT3/SRC/RXRA/MED27/PIK3R1/ATP2A2/NCOA1/MAPK1/STAT1/MED4/DIO2/MED17/KAT2B/SLC16A10/RHEB/SLC16A2/FXYD2/PFKM/PIK3R3/MED24/PLCG2/CASP9/ATP2A1/MED1/DIO1/RCAN1/EP300/PDPK1/MED13/ATP1A2/FOXO1/HDAC2/CCND1/PFKP/ITGAV/ITGB3/CRE…	78
hsa04721	Synaptic vesicle cycle	53/4075	78/8098	0.00116809	0.0113717	0.00763053	ATP6V1H/ATP6V1C1/ATP6V1D/CLTC/ATP6V1G2/STX3/SLC1A1/ATP6V1G1/SLC6A11/SLC1A7/CPLX1/VAMP2/SLC6A2/SLC6A12/AP2M1/ATP6V0D1/AP2A1/CLTB/CACNA1B/SLC18A1/SLC1A2/ATP6V0B/UNC13A/SLC17A7/STX1A/CLTCL1/RAB3A/STXBP1/TCIRG1/SLC6A1/ATP6V0A4/DNM1/SLC1A6/ATP6V1B1/AP2B1/SNAP25/SLC6A9/SLC6A7/CPLX2/ATP6V1E1/NAPA/AP2A2/CLTA/AP2S1/SLC18A2/ATP6V0C/SLC6A4/ATP6V1A/CACNA1A/NSF/DNM2/ATP6V1F/ATP6V1C2	53
hsa05165	Human papillomavirus infection	194/4075	331/8098	0.00122122	0.0115492	0.00774968	PSEN1/PPP2R5E/ATP6V1H/ATP6V1C1/NRAS/NOTCH4/ATP6V1D/CDC42/PPP2R5C/MPP5/COL4A4/PXN/PSMC1/RELA/ITGA6/SOS2/ITGA10/PTK2/MFNG/DVL1/ATP6V1G2/COL4A6/CDK6/TBP/AKT1/COL9A2/ATP6V1G1/ITGB7/HRAS/COL4A3/BAK1/CSNK1A1/ITGA9/TRAF3/FZD8/JAG1/COL4A5/LAMC2/CHUK/ITGA3/HDAC1/THBS4/FZD6/CCNA2/PPP2R2D/LAMB3/PPP2R1B/ITGB1/BCAP31/EGFR/ITGA8/VWF/PPP2R2B/COL9A1/AXIN1/GSK3B/COL6A6/FADD/PPP2R2C/WNT6/PRKCZ/TNFRSF1A/TUBG1/IKBKE…	194
hsa03022	Basal transcription factors	33/4075	45/8098	0.00137721	0.0126627	0.0084968	MNAT1/GTF2H3/TAF2/TBP/TAF9/TAF12/TAF5L/GTF2H1/GTF2A1/GTF2F2/TAF4/GTF2B/CDK7/GTF2H5/TAF7/GTF2E1/ERCC3/GTF2E2/TBPL1/GTF2F1/GTF2A2/GTF2H4/TAF11/TAF7L/TAF15/GTF2I/TAF13/ERCC2/GTF2A1L/TAF1/TAF10/TAF5/TAF6	33
hsa03018	RNA degradation	53/4075	79/8098	0.00182586	0.0163341	0.0109604	HSPD1/ENO1/XRN2/PABPC1/MPHOSPH6/EXOSC10/DIS3/PARN/PABPC4/EDC3/SKIV2L/CNOT1/EXOSC3/TOB2/PATL1/CNOT3/EXOSC2/LSM5/PABPC5/DHX36/CNOT2/C1D/NUDT16/CNOT4/DCP1B/HSPA9/DIS3L/PFKM/ENO3/DCP2/LSM1/ZCCHC7/LSM6/BTG2/PNPT1/CNOT6/DDX6/EXOSC9/ENO2/PABPC4L/PNLDC1/EXOSC8/PAN2/PFKP/TTC37/CNOT7/DCPS/PABPC1L2A/BTG3/BTG4/TOB1/LSM4/CNOT6L	53
hsa04670	Leukocyte transendothelial migration	73/4075	114/8098	0.00204314	0.0177969	0.0119419	ACTN1/CDC42/VCAM1/ITGB2/PXN/VAV1/ITK/PTK2/ITGAL/CXCR4/CLDN5/JAM2/CLDN11/PRKCB/GNAI1/CLDN10/ITGAM/CYBB/PECAM1/NCF4/CXCL12/RHOH/CLDN3/MSN/CYBA/BCAR1/ESAM/PTPN11/ITGB1/EZR/TXK/MAPK14/CLDN15/CLDN14/VAV2/GNAI3/CTNND1/JAM3/VASP/ARHGAP5/MYL5/RASSF5/CLDN18/PIK3R1/RAC1/THY1/CD99L2/MYL9/RAPGEF3/SIPA1/RAP1B/ITGA4/PIK3R3/ROCK1/VCL/PLCG2/CDH5/RAP1A/CLDN17/OCLN/RAPGEF4/CD99/ACTN4/F11R/CLDN16/CLDN8/CTNNB1/MYL12…	73
hsa04141	Protein processing in endoplasmic reticulum	105/4075	171/8098	0.00209745	0.0178014	0.011945	EIF2S1/HSP90AA1/TRAM1/HSPA8/BCL2/RAD23B/UBQLN1/DNAJC5/DNAJA2/DERL1/MAN1C1/SEC31B/HSP90AB1/DERL3/HSPH1/HSPA2/DDOST/SEC23A/SSR1/NPLOC4/UBE2D3/NSFL1C/RPN2/SEC63/ATF6B/UBE2J2/BAK1/SEC23B/EIF2AK1/SEC61B/SEC24B/P4HB/VCP/HSPA5/SEL1L/PDIA6/BCAP31/ATXN3/STT3A/UBE2G1/SAR1A/DAD1/SSR3/UBXN8/RPN1/SEC61A1/SEC61G/CALR/HSPBP1/UBQLN2/DNAJC3/MOGS/DNAJA1/HSP90B1/AMFR/MAN1B1/HYOU1/HSPA1L/RNF185/RRBP1/CUL1/PDIA4/CAPN…	105
hsa05418	Fluid shear stress and atherosclerosis	87/4075	139/8098	0.00221604	0.0183377	0.0123049	HSP90AA1/VCAM1/BCL2/RELA/CAV1/CAV2/PTK2/CALM1/HSP90AB1/MAP3K7/AKT1/GSTP1/KLF2/PECAM1/MAP2K4/SUMO2/CYBA/CHUK/TXN/SDC1/ARHGEF2/TRPV4/MAPK14/SDC4/IL1A/GSTM5/BMPR1B/MAP2K6/PRKCZ/TNFRSF1A/GSTM2/AKT3/SRC/CALM2/GSTM4/MEF2C/PIK3R1/RAC1/SUMO3/PDGFA/HSP90B1/ACVR1/SUMO1/JUN/ACVR2B/PRKAA2/MEF2A/GSTM3/TXN2/RAC3/PIK3R3/SELE/PLAT/PRKAA1/THBD/FOS/NQO1/CDH5/ACVR2A/NOS3/ITGA2B/IFNG/VEGFA/IKBKB/NFKB1/GSTO1/CALML4/G…	87
hsa04072	Phospholipase D signaling pathway	92/4075	148/8098	0.00227706	0.0183831	0.0123353	NRAS/PLCB2/RRAS2/SOS2/ADCY6/CYTH4/KIT/ADCY5/AKT1/PIK3R6/PIK3CG/PDGFRA/HRAS/GNA12/FYN/SHC1/PDGFD/PLCB3/MRAS/ADCY4/PTPN11/ARF1/PIP5K1B/PIK3R5/DGKH/EGFR/PLA2G4C/SHC2/LPAR3/AGT/FCER1G/RALB/LPAR4/PLCB4/CYTH3/MAP2K1/AKT3/GNAS/MS4A2/GRM7/PIK3R1/AGPAT4/MAPK1/SPHK2/PDGFA/GRM2/AGTR1/PTGFR/FCER1A/RAPGEF3/GRM8/RALA/PIP5K1A/INSR/PLA2G4E/LPAR5/ADCY7/RHEB/DNM1/PIK3R3/GAB2/DGKB/PLA2G4D/PLCG2/DGKD/PDGFC/PLD2/DGKA…	92
hsa04115	p53 signaling pathway	49/4075	73/8098	0.00263659	0.0204154	0.013699	BCL2/EI24/SIAH1/CDK6/PERP/IGF1/CYCS/SFN/BBC3/CHEK1/RRM2/SERPINB5/SIVA1/GADD45G/SERPINE1/CCNE2/AIFM2/CDKN1A/CCNB1/TP53AIP1/SESN2/TNFRSF10A/SESN3/RPRM/MDM4/PPM1D/GADD45A/CCNE1/CASP9/RRM2B/CD82/THBS1/CASP8/BCL2L1/CDK2/ZMAT3/TNFRSF10B/SESN1/CCNB2/IGFBP3/CCND1/RCHY1/GADD45B/FAS/ATR/PTEN/TP53/MDM2/TSC2	49
hsa04658	Th1 and Th2 cell differentiation	60/4075	92/8098	0.00265535	0.0204154	0.013699	HLA-DMA/CD247/RELA/CD4/HLA-DOA/STAT5A/HLA-DMB/IL2RG/HLA-DPB1/ZAP70/LCK/LAT/TBX21/HLA-DPA1/JAG1/CD3G/CHUK/CD3D/IL2RB/IL12A/HLA-DOB/CD3E/IFNGR1/JAG2/MAPK14/RUNX3/STAT4/NFKBIE/PPP3CA/PPP3R1/HLA-DRA/IL2RA/MAPK1/TYK2/JAK1/HLA-DRB5/MAML3/JUN/STAT1/HLA-DRB1/NFATC1/IL12RB1/STAT6/IL12RB2/NFKBIA/JAK2/DLL1/FOS/DLL4/HLA-DQA2/IFNG/IKBKB/NFKB1/IFNGR2/IL4R/STAT5B/PLCG1/PPP3CC/MAF/IKBKG	60
hsa04015	Rap1 signaling pathway	126/4075	210/8098	0.00271383	0.0204154	0.013699	NRAS/SKAP1/CDC42/RASGRP2/APBB1IP/PLCB2/ITGB2/ADORA2A/VAV1/ADCY6/CRK/CALM1/FGF18/ITGAL/KIT/ADCY5/PRKCB/AKT1/CSF1R/GNAI1/LAT/IGF1/ITGAM/RASGRP3/CNR1/PRKD1/PDGFRA/HRAS/MET/PDGFD/PLCB3/MAGI2/MRAS/BCAR1/HGF/ADCY4/NGF/ITGB1/FGF2/EGFR/PLCE1/MAPK14/LPAR3/GRIN2A/PFN1/VEGFC/CRKL/VAV2/MAP2K6/GNAI3/FGFR1/PRKCZ/CTNND1/RALB/LPAR4/PLCB4/VASP/MAP2K1/AKT3/GNAS/SRC/CALM2/RASSF5/ENAH/PIK3R1/RAC1/FGF1/LCP2/MAPK1/TEK…	126
hsa03040	Spliceosome	91/4075	147/8098	0.00286553	0.0209666	0.0140689	SNW1/HNRNPK/DHX15/PUF60/HSPA8/SNRPB2/PHF5A/EFTUD2/HSPA2/CTNNBL1/HNRNPC/SF3A3/PRPF40A/EIF4A3/SMNDC1/SNRPB/BCAS2/PRPF4/PRPF6/PPIL1/SF3B2/MAGOH/SNRPD1/U2AF2/PRPF19/RBM25/FUS/SNRPC/NCBP2/SF3B4/CWC15/RBMX/CDC5L/DHX38/PLRG1/SNRNP40/NCBP1/PRPF38A/HNRNPM/HNRNPA1/SNRPF/DDX23/U2AF1L4/SNRPE/SF3B3/DDX5/SF3B1/LSM5/DHX8/HNRNPA3/PRPF38B/BUD31/SNRPG/TCERG1/CRNKL1/PRPF31/SNRPD2/HSPA1L/ACIN1/SNRPD3/WBP11/SNRPA1/DH…	91
hsa04659	Th17 cell differentiation	69/4075	108/8098	0.00291379	0.0209666	0.0140689	HSP90AA1/HIF1A/HLA-DMA/CD247/RELA/CD4/HLA-DOA/STAT5A/HLA-DMB/IL2RG/HSP90AB1/HLA-DPB1/ZAP70/LCK/LAT/TBX21/IL21R/HLA-DPA1/CD3G/CHUK/CD3D/IL2RB/HLA-DOB/CD3E/IFNGR1/MAPK14/IRF4/TGFBR1/IL1RAP/NFKBIE/PPP3CA/RXRA/PPP3R1/HLA-DRA/IL2RA/RORC/MAPK1/TYK2/JAK1/IL27RA/HLA-DRB5/JUN/STAT1/HLA-DRB1/FOXP3/NFATC1/IL12RB1/STAT6/NFKBIA/AHR/RORA/JAK2/FOS/RUNX1/HLA-DQA2/IFNG/SMAD4/IKBKB/SMAD2/NFKB1/IFNGR2/IL4R/STAT5B/I…	69
hsa04530	Tight junction	103/4075	169/8098	0.00322859	0.0227375	0.0152571	CGNL1/ACTN1/CDC42/MPP5/TUBA1C/WAS/IGSF5/HCLS1/TJP3/CLDN5/JAM2/CLDN11/ARPC1A/CLDN10/CACNA1D/CD1E/TUBA4A/CLDN3/MSN/HSPA4/CD1D/RAP2C/MYH9/AMOTL1/NEDD4/PPP2R2D/PCNA/PPP2R1B/ITGB1/EZR/AMOT/ARHGEF2/ACTR3/MYH11/PPP2R2B/CLDN15/RDX/CD1C/MYH14/ACTR2/CLDN14/ARPC3/PPP2R2C/PRKCZ/MPDZ/TUBA1B/JAM3/VASP/PPP2CB/SRC/PPP2R1A/CLDN18/RAC1/ARPC5L/CD1B/PRKAB2/MYL9/JUN/CTTN/RAB8A/LLGL1/DLG2/PRKAA2/CGN/PRKAG1/DLG3/TJP1/C…	103
hsa04142	Lysosome	80/4075	128/8098	0.00345928	0.0238546	0.0160068	ATP6V1H/LAPTM5/FUCA1/CLTC/IDUA/ABCA2/LAMP1/CTSC/CTSH/AP4E1/AP3D1/AP1G1/DNASE2B/CTSS/CTSW/ARSB/AP3B2/GGA2/ARSG/LAPTM4A/LAPTM4B/FUCA2/GUSB/CTSF/CD164/LAMP2/ATP6V0D1/NPC2/CLTB/AP1S1/IGF2R/ATP6V0B/AP3S1/GALNS/CLTCL1/CTSK/TCIRG1/ATP6V0A4/CTSO/HYAL1/AP1S2/PPT1/DNASE2/SORT1/ATP6AP1/NPC1/CD63/CLN3/CTSA/MFSD8/GM2A/CLTA/AGA/PPT2/ENTPD4/NAGLU/AP3M2/ATP6V0C/AP1S3/AP1M2/SLC11A1/TPP1/AP1B1/CTSG/ASAH1/GGA3/GNPT…	80
hsa00510	N-Glycan biosynthesis	35/4075	50/8098	0.00368737	0.0247458	0.0166047	ALG2/MGAT3/MGAT4A/DPM1/ST6GAL1/MAN1C1/DDOST/ALG1/DOLK/RPN2/DOLPP1/ALG14/DPAGT1/MGAT2/STT3A/DAD1/RPN1/B4GALT2/MAN2A2/ALG8/MOGS/ALG3/MAN1B1/MGAT4B/ALG5/GANAB/ALG13/STT3B/DPM2/ALG9/ALG11/ALG6/MGAT1/ALG12/MGAT4C	35
hsa01521	EGFR tyrosine kinase inhibitor resistance	52/4075	79/8098	0.00373803	0.0247458	0.0166047	NRAS/BCL2/SOS2/PRKCB/NRG1/AKT1/IGF1/PDGFRA/HRAS/EIF4E/SHC1/MET/PDGFD/TGFA/HGF/FGF2/EGFR/SHC2/GSK3B/MAP2K1/AKT3/SRC/PIK3R1/MAPK1/PDGFA/JAK1/EIF4EBP1/IGF1R/EIF4E2/JAK2/PIK3R3/PLCG2/EIF4E1B/PDGFC/GAB1/PDGFRB/BCL2L1/VEGFA/GRB2/RPS6KB1/SHC3/KDR/PLCG1/ERBB2/FGFR2/IL6R/PTEN/SHC4/MAP2K2/ERBB3/NF1/PIK3CD	52
hsa05131	Shigellosis	145/4075	247/8098	0.0044314	0.0287607	0.0192988	UBE2V2/ACTN1/CDC42/CD44/PLCB2/BCL2/PXN/RELA/BCL10/CRK/PTK2/GLMN/CYTH4/MAP3K7/HCLS1/RPTOR/MAP1LC3A/AKT1/ARPC1A/HK3/CYCS/RRAGD/SHARPIN/UBE2D3/MAP1LC3C/TLR5/VDAC1/TRAF5/UBE2V1/PLCB3/ELMO1/BCAR1/CHUK/RRAGC/BNIP3/ARF1/PPID/ITGB1/EGFR/ARHGEF2/ACTR3/C3/PLCE1/MAPK14/FNBP1/PFN1/PLCD4/GSK3B/ACTR2/ARPC3/TLR4/CRKL/WASL/UBC/U2AF1L4/TNFRSF1A/PLCB4/BECN1/PIK3R4/CYTH3/PLCD3/AKT3/SRC/MYL5/CASP4/NLRC4/PIK3R1/RAC1/…	145
hsa04928	Parathyroid hormone synthesis, secretion and action	67/4075	106/8098	0.00485744	0.0309195	0.0207474	PLCB2/BCL2/ADCY6/ADCY5/PRKCB/GNAI1/GNA12/ATF6B/PDE4C/PLCB3/PTH1R/PTHLH/ADCY4/EGFR/KL/ARRB1/NACA/TNFSF11/PDE4A/GNAI3/FGFR1/MMP24/PLCB4/VDR/MAP2K1/GNAS/PDE4D/RXRA/MMP25/SLC34A2/MEF2C/MAPK1/JUND/PDE4B/ITPR1/CDKN1A/ARRB2/ATF2/MMP14/MEF2A/ADCY7/CREB3L4/MAFB/ITPR3/NR4A2/LRP6/GNAQ/HBEGF/FOS/FGF23/PLD2/GCM1/MEF2D/ATF4/MMP13/GNA13/CREB1/ARHGEF1/AKAP13/RUNX2/CREB3/GNA11/CYP24A1/PLD1/ADCY9/PRKACB/CREB3L2	67
hsa04672	Intestinal immune network for IgA production	34/4075	49/8098	0.0052312	0.0326703	0.0219222	TNFRSF13B/HLA-DMA/TNFRSF13C/HLA-DOA/HLA-DMB/HLA-DPB1/CXCR4/CD40LG/ITGB7/CD28/HLA-DPA1/CXCL12/ICOSLG/CCL25/CCR10/HLA-DOB/TNFRSF17/HLA-DRA/ICOS/TNFSF13B/IL10/HLA-DRB5/CD40/AICDA/HLA-DRB1/MAP3K14/CD86/CD80/IL15/LTBR/ITGA4/PIGR/HLA-DQA2/CCR9	34
hsa03060	Protein export	18/4075	23/8098	0.00573596	0.0347516	0.0233188	SRP54/SRP72/SEC63/SEC61B/HSPA5/SPCS2/SEC61A1/SEC61G/SEC11A/SEC11C/SRPRB/SRP68/OXA1L/SRP14/SRP9/IMMP1L/SEC62/IMMP2L	18
hsa04722	Neurotrophin signaling pathway	74/4075	119/8098	0.00577444	0.0347516	0.0233188	PSEN1/NRAS/CDC42/BCL2/RELA/SOS2/CRK/CALM1/AKT1/NTRK3/IRS1/MATK/HRAS/CAMK2D/SHC1/PRDM4/IRAK1/SH2B2/NGF/PTPN11/YWHAE/SHC2/CAMK4/MAPK14/GSK3B/CRKL/NFKBIE/NTRK2/IRAK3/MAP2K1/AKT3/CALM2/NTF3/PIK3R1/RAC1/ARHGDIB/MAPK1/RIPK2/JUN/TRAF6/NFKBIA/RPS6KA1/RAP1B/FASLG/PIK3R3/PLCG2/RPS6KA2/SORT1/FRS2/GAB1/RAP1A/PDPK1/ATF4/SH2B3/IKBKB/GRB2/NFKB1/SHC3/ZNF274/CALML4/RPS6KA6/MAPK7/PSEN2/PLCG1/MAP2K7/CAMK2B/RPS6KA5/…	74
hsa04310	Wnt signaling pathway	100/4075	166/8098	0.00600715	0.0355066	0.0238254	PSEN1/CSNK2A1/MYC/DAAM1/CSNK2A2/TLE2/PLCB2/FOSL1/SIAH1/VANGL1/DVL1/MAP3K7/SERPINF1/RUVBL1/PRKCB/RSPO1/RSPO3/CAMK2D/CSNK1A1/FRAT1/FZD8/PLCB3/CXXC4/FZD6/PPARD/NFATC4/AXIN1/GSK3B/SFRP4/TLE6/WNT6/PPP3CA/PLCB4/CTBP2/LEF1/PPP3R1/SOX17/INVS/RAC1/MMP7/BTRC/WIF1/DAAM2/NKD2/CACYBP/PORCN/WNT5B/WNT7A/JUN/CUL1/NFATC1/FZD5/FRAT2/GPC4/WNT7B/AXIN2/RSPO2/RYK/SFRP2/CSNK1E/RAC3/FZD4/WNT2/FZD7/DKK2/ROR2/CHD8/RBX1/LR…	100
hsa05100	Bacterial invasion of epithelial cells	50/4075	77/8098	0.00661629	0.0382952	0.0256966	CDC42/PXN/CAV1/CAV2/CRK/PTK2/CLTC/HCLS1/ARPC1A/CD2AP/SHC1/MET/ELMO1/BCAR1/ITGB1/SHC2/ACTR3/ACTR2/ARPC3/CRKL/WASL/SRC/CLTB/PIK3R1/RAC1/ARPC5L/MAD2L2/CTTN/ELMO3/CBL/CLTCL1/DNM1/PIK3R3/VCL/WASF1/ARPC2/GAB1/ITGA5/WASF2/RHOG/ARPC1B/CLTA/ELMO2/SHC3/DNM2/CTNNB1/ILK/CDH1/SHC4/PIK3CD	50
hsa04062	Chemokine signaling pathway	114/4075	192/8098	0.00671033	0.0382952	0.0256966	GNG7/NRAS/CDC42/RASGRP2/PLCB2/PXN/RELA/SOS2/VAV1/CCL19/ADCY6/CRK/ITK/GNB3/PTK2/WAS/DOCK2/GNG12/FGR/ADCY5/CX3CL1/CXCR4/PRKCB/AKT1/GNAI1/PIK3R6/PIK3CG/PREX1/CCR7/HRAS/SHC1/CXCL12/CX3CR1/GNB1/CXCR5/PLCB3/CCR4/ELMO1/BCAR1/CHUK/HCK/ADCY4/GNG5/CCL25/PIK3R5/GNGT2/CCR10/CXCR3/SHC2/ARRB1/CXCL13/CCL17/GSK3B/CCR1/CRKL/VAV2/CCL18/CXCL16/GNAI3/PRKCZ/PLCB4/MAP2K1/AKT3/SRC/GRK4/CCL22/GRK5/PIK3R1/RAC1/MAPK1/CCR6…	114
hsa05205	Proteoglycans in cancer	121/4075	205/8098	0.0069613	0.0390541	0.0262058	MYC/NRAS/HIF1A/CDC42/CD44/PXN/RRAS2/CAV1/PTPN6/CAV2/SOS2/VAV1/PTK2/HCLS1/PRKCB/AKT1/ANK2/IGF1/SLC9A1/HRAS/CAMK2D/MET/MSN/FZD8/MRAS/HGF/FZD6/PTPN11/ITGB1/EZR/FGF2/EGFR/SDC1/PLCE1/MAPK14/SDC4/RDX/PPP1CC/TLR4/VAV2/GPC3/FGFR1/WNT6/MAP2K1/AKT3/SRC/DDX5/PIK3R1/RAC1/FLNA/PPP1CB/MAPK1/ITPR1/CDKN1A/WNT5B/IQGAP1/WNT7A/CTTN/CBL/FLNB/PAK1/IGF1R/FZD5/PTCH1/DCN/EIF4B/WNT7B/FASLG/ITPR3/FZD4/WNT2/PIK3R3/FZD7/TWI…	121
hsa05340	Primary immunodeficiency	27/4075	38/8098	0.00760486	0.041723	0.0279967	TNFRSF13B/CD4/TNFRSF13C/BTK/CD79A/CD19/IL2RG/ZAP70/LCK/CD40LG/CD3D/CD3E/PTPRC/CIITA/CD8A/AIRE/CD8B/ICOS/DCLRE1C/CD40/AICDA/TAP2/TAP1/UNG/RAG1/BLNK/IKBKG	27
hsa04512	ECM-receptor interaction	56/4075	88/8098	0.00783033	0.041723	0.0279967	COL4A4/CD44/ITGA6/SV2A/ITGA10/SV2B/COL4A6/COL9A2/ITGB7/COL4A3/ITGA9/COL4A5/LAMC2/ITGA3/THBS4/GP1BA/LAMB3/ITGB1/SDC1/ITGA8/VWF/SDC4/COL9A1/CD47/COL6A6/AGRN/ITGA11/LAMA3/LAMB2/FREM1/TNN/TNC/THBS3/FRAS1/HMMR/ITGA4/GP6/LAMA5/ITGB4/RELN/THBS1/ITGA2B/ITGA5/FREM2/LAMA2/COL6A3/ITGB6/ITGAV/ITGB3/COL4A1/ITGA7/LAMC1/LAMA4/COL6A2/ITGA1/ITGA2	56
hsa05221	Acute myeloid leukemia	44/4075	67/8098	0.00783469	0.041723	0.0279967	MYC/NRAS/PIM2/RELA/SOS2/STAT5A/KIT/AKT1/FLT3/CSF1R/SPI1/ITGAM/HRAS/DUSP6/CHUK/CCNA2/PPARD/JUP/RUNX1T1/MAP2K1/LEF1/AKT3/PIK3R1/MAPK1/CD14/EIF4EBP1/CCNA1/PIK3R3/ZBTB16/CSF2/RUNX1/CEBPA/BCL2A1/IKBKB/GRB2/NFKB1/RPS6KB1/PIM1/CCND1/STAT5B/PML/IKBKG/MAP2K2/PIK3CD	44
hsa04625	C-type lectin receptor signaling pathway	65/4075	104/8098	0.00794124	0.041723	0.0279967	NRAS/RRAS2/RELA/BCL10/CALM1/AKT1/CARD9/HRAS/IL17D/MRAS/CHUK/PTPN11/IL12A/MAPK14/CCL17/NFATC4/FCER1G/PPP3CA/IKBKE/AKT3/SRC/PLK3/CALM2/PPP3R1/CCL22/PIK3R1/EGR2/MAPK1/IL10/ITPR1/RELB/JUN/STAT1/CLEC4E/MAP3K14/NFATC1/PAK1/NFKBIA/CLEC6A/ITPR3/PIK3R3/PLCG2/BCL3/KSR1/CASP8/CD209/CASP1/IKBKB/PTGS2/NFKB1/CALML4/LSP1/CYLD/NLRP3/IL1B/MALT1/SYK/NFKB2/PPP3CC/ARHGEF12/IKBKG/IRF1/PIK3CD/MDM2/CBLB	65
hsa00900	Terpenoid backbone biosynthesis	17/4075	22/8098	0.00908365	0.0469795	0.0315238	ZMPSTE24/RCE1/DHDDS/NUS1/FNTB/GGPS1/ICMT/HMGCS2/HMGCR/HMGCS1/FNTA/PDSS1/IDI1/PDSS2/MVK/PCYOX1/MVD	17
hsa04012	ErbB signaling pathway	54/4075	85/8098	0.00936878	0.0472398	0.0316985	MYC/NRAS/SOS2/CRK/STAT5A/PTK2/PRKCB/NRG1/AKT1/MAP2K4/HRAS/CAMK2D/SHC1/TGFA/PAK3/EGFR/SHC2/EREG/GSK3B/CRKL/MAP2K1/AKT3/SRC/CDKN1B/ABL2/PIK3R1/MAPK1/CDKN1A/EIF4EBP1/JUN/CBL/PAK1/BTC/NRG3/PAK2/PIK3R3/PLCG2/HBEGF/GAB1/NCK2/GRB2/PAK6/RPS6KB1/SHC3/STAT5B/PLCG1/MAP2K7/ERBB2/CAMK2B/SHC4/MAP2K2/ERBB3/PIK3CD/CBLB	54
hsa04910	Insulin signaling pathway	83/4075	137/8098	0.00954001	0.0472398	0.0316985	ACACB/NRAS/SOCS4/PYGL/SOS2/PTPN1/CRK/CALM1/FBP1/RPTOR/AKT1/HK3/IRS1/PPP1R3F/HRAS/EIF4E/SHC1/PYGB/SH2B2/SORBS1/SHC2/GSK3B/PPP1CC/CRKL/PRKCZ/GYS1/PDE3B/MAP2K1/AKT3/FASN/CALM2/GCK/PHKA2/PIK3R1/PRKAR1A/PPP1CB/MAPK1/PRKAB2/LIPE/HK2/EIF4EBP1/MKNK1/CBL/EIF4E2/INSR/PYGM/PRKAA2/PRKAG1/RHEB/FBP2/G6PC3/PIK3R3/PCK1/INPP5A/PRKAA1/EIF4E1B/ACACA/PTPRF/PRKAR1B/PHKG1/SOCS2/PDPK1/IKBKB/GRB2/PRKAG2/PPP1R3D/GYS2/RPS…	83
hsa04520	Adherens junction	46/4075	71/8098	0.00956213	0.0472398	0.0316985	CSNK2A1/CSNK2A2/ACTN1/SNAI2/CDC42/PTPN6/PTPN1/WAS/MAP3K7/FYN/MET/SORBS1/EGFR/PTPRM/TGFBR1/YES1/WASL/FGFR1/CTNND1/LEF1/SRC/RAC1/ACP1/PTPRJ/MAPK1/BAIAP2/IQGAP1/PTPRB/IGF1R/INSR/TJP1/RAC3/VCL/FER/WASF1/PTPRF/EP300/WASF2/SMAD4/ACTN4/CREBBP/CSNK2B/CTNNB1/ERBB2/CDH1/SSX2IP	46
hsa00562	Inositol phosphate metabolism	47/4075	73/8098	0.0104789	0.0501456	0.0336483	INPP5D/PLCB2/PIP4K2C/PIK3CG/IMPA1/IPPK/PLCB3/MTM1/INPP5J/PIP5K1B/PLCE1/PLCD4/MTMR2/ITPK1/INPP4B/PLCB4/PLCD3/IMPA2/PI4K2A/PLCH1/MINPP1/MTMR14/PIP5K1A/PI4K2B/FIG4/MTMR7/MTMR8/PIP5KL1/PIP4K2A/PIK3C2A/PIK3C2B/OCRL/INPP5A/PLCG2/ITPKB/TPI1/PIP4K2B/IPMK/INPP5B/PLCG1/ITPKC/INPP5F/PTEN/PIK3C2G/SACM1L/PIK3CD/PLCZ1	47
hsa04728	Dopaminergic synapse	80/4075	132/8098	0.0106688	0.0501456	0.0336483	PPP2R5E/GNG7/PPP2R5C/PLCB2/GNB3/CALM1/GNG12/ADCY5/PRKCB/AKT1/GNAI1/TH/CACNA1D/ATF6B/CAMK2D/KIF5B/KIF5C/GNB1/PLCB3/KIF5A/PPP2R2D/KCNJ6/GNG5/PPP2R1B/GNGT2/CACNA1C/ARRB1/MAPK14/PPP2R2B/MAOB/GRIN2A/GSK3B/PPP1CC/PPP1R1B/PPP2R2C/GNAI3/PPP3CA/PLCB4/PPP2CB/AKT3/GNAS/CALM2/PPP2R1A/CACNA1B/SLC18A1/PPP1CB/PPP2R5D/PPP2R5B/ITPR1/ARRB2/ATF2/PPP2R3A/CREB3L4/DRD3/ITPR3/GNG2/GRIA2/GNAQ/FOS/GNAL/GNB5/PPP2R3B/ATF4/…	80
hsa04145	Phagosome	91/4075	152/8098	0.0107047	0.0501456	0.0336483	ATP6V1H/ATP6V1C1/ATP6V1D/DYNC1H1/HLA-DMA/TUBA1C/ITGB2/DYNC1I2/TUBB/HLA-DOA/HLA-DMB/HLA-DPB1/ATP6V1G2/LAMP1/ITGAM/CYBB/CORO1A/ATP6V1G1/NCF4/HLA-DPA1/COLEC12/TUBA4A/SEC61B/RAB7A/CTSS/TUBB6/CYBA/THBS4/ITGB1/RAB5C/VAMP3/HGS/C3/HLA-DOB/SEC61A1/SEC61G/TLR4/CALR/LAMP2/TUBA1B/EEA1/ATP6V0D1/HLA-DRA/RAC1/CD14/COLEC11/TUBB3/ATP6V0B/TUBB2A/HLA-DRB5/DYNC1LI1/DYNC1LI2/TAP2/HLA-DRB1/THBS3/TAP1/FCAR/TCIRG1/ATP6V…	91
hsa04211	Longevity regulating pathway	56/4075	89/8098	0.0108949	0.0501456	0.0336483	NRAS/RELA/ADCY6/ADCY5/RPTOR/AKT1/IRS1/RB1CC1/IGF1/PPARG/HRAS/ATF6B/EIF4E/ADIPOR1/ADCY4/CAMK4/KL/AKT3/PIK3R1/PRKAB2/EIF4EBP1/SESN2/ATF2/SESN3/IGF1R/EIF4E2/INSR/PRKAA2/PRKAG1/CAMKK2/ATG5/ADCY7/CREB3L4/RHEB/PIK3R3/PRKAA1/EIF4E1B/ADIPOR2/ATF4/PRKAG2/ADIPOQ/NFKB1/RPS6KB1/SESN1/SOD2/FOXO1/CREB1/CAT/PPARGC1A/CREB3/ADCY9/TP53/PIK3CD/PRKACB/CREB3L2/TSC2	56
hsa03020	RNA polymerase	23/4075	32/8098	0.0109078	0.0501456	0.0336483	POLR2C/POLR2K/POLR3H/POLR3F/POLR3B/POLR3G/POLR3A/POLR2G/POLR1C/POLR2B/POLR1A/POLR3GL/POLR1E/POLR2D/POLR2A/POLR1D/POLR3E/POLR2J/POLR2H/POLR2E/POLR2F/POLR3C/POLR1B	23
hsa00520	Amino sugar and nucleotide sugar metabolism	33/4075	49/8098	0.011764	0.0533411	0.0357926	GNPNAT1/RENBP/PMM2/CYB5R1/HK3/UAP1/CHIT1/PGM3/GNE/NANP/GCK/CMAS/GALK2/GNPDA1/PGM2/HK2/CYB5R3/GALE/FPGT/UGP2/CYB5R4/PGM1/NPL/NAGK/CYB5RL/GMDS/GMPPB/GMPPA/NANS/GALK1/HKDC1/GFPT2/UGDH	33
hsa04066	HIF-1 signaling pathway	67/4075	109/8098	0.0120771	0.0540207	0.0362486	LDHA/HIF1A/ENO1/PGK1/BCL2/RELA/PRKCB/AKT1/HK3/NOS2/IGF1/CYBB/EIF4E/CAMK2D/SLC2A1/EGFR/IFNGR1/TLR4/GAPDH/MAP2K1/AKT3/CDKN1B/PIK3R1/CUL2/ALDOA/SERPINE1/MAPK1/TEK/EPO/CDKN1A/HK2/EIF4EBP1/ANGPT1/MKNK1/IGF1R/EIF4E2/INSR/PFKM/LTBR/PIK3R3/ENO3/RBX1/PLCG2/TF/EIF4E1B/NOS3/EP300/ENO2/IFNG/VEGFA/LDHC/PDHA1/NFKB1/RPS6KB1/IFNGR2/PFKP/CREBBP/MKNK2/PLCG1/LDHB/ERBB2/TFRC/HKDC1/CAMK2B/IL6R/MAP2K2/PIK3CD	67
hsa05323	Rheumatoid arthritis	58/4075	93/8098	0.0125103	0.0548329	0.0367936	ATP6V1H/ATP6V1C1/LTB/ATP6V1D/HLA-DMA/ITGB2/HLA-DOA/HLA-DMB/ITGAL/HLA-DPB1/ATP6V1G2/ATP6V1G1/TNFRSF11A/CD28/HLA-DPA1/CXCL12/HLA-DOB/IL1A/MMP3/TNFSF11/TLR4/MMP1/ATP6V0D1/HLA-DRA/TNFSF13B/TEK/ATP6V0B/CCL5/HLA-DRB5/JUN/ANGPT1/HLA-DRB1/CTLA4/CCL3/CD86/CTSK/TCIRG1/ATP6V0A4/CD80/IL15/ATP6V1B1/FOS/CSF2/ATP6AP1/HLA-DQA2/IFNG/ATP6V1E1/VEGFA/CSF1/IL11/ATP6V0C/ATP6V1A/IL1B/ATP6V1F/ICAM1/CXCL5/ATP6V1C2/IL18	58
hsa05120	Epithelial cell signaling in Helicobacter pylori infection	45/4075	70/8098	0.0125944	0.0548329	0.0367936	ATP6V1H/ATP6V1C1/ATP6V1D/CDC42/RELA/IGSF5/ATP6V1G2/JAM2/ATP6V1G1/MAP2K4/MET/ADAM10/CHUK/PTPN11/EGFR/MAPK14/JAM3/ATP6V0D1/SRC/RAC1/ATP6V0B/CCL5/JUN/MAP3K14/PAK1/NFKBIA/TCIRG1/ATP6V0A4/TJP1/PTPRZ1/ATP6V1B1/PLCG2/HBEGF/ATP6AP1/ATP6V1E1/IKBKB/NFKB1/ATP6V0C/F11R/ATP6V1A/PLCG1/ATP6V1F/CSK/ATP6V1C2/IKBKG	45
hsa05014	Amyotrophic lateral sclerosis	205/4075	365/8098	0.0127557	0.0548329	0.0367936	EIF2S1/ACTR10/PSMA3/RAE1/PSMC6/VAPB/TUBA1C/HNRNPA2B1/PSMA6/PSMD7/PSMB2/PSMD14/PSMD12/BCL2/DNAH1/UBQLN1/PSMC1/PSMB5/DERL1/ATG2B/TUBB/NUP98/NUP37/PSMA1/ADRM1/NUP54/NEFH/TARDBP/KLC1/MAP1LC3A/NRG1/NUP210/PSMD1/PSMC2/RB1CC1/NOS2/PSMD11/CYCS/PSMA7/PSMD2/NDUFB9/MAP1LC3C/PSMD13/DNALI1/TNFRSF1B/VDAC1/CYC1/KIF5B/PSMB7/KIF5C/TUBA4A/PSMB1/GPX3/SDHB/DCTN5/SIGMAR1/RAB1A/RANBP2/KIF5A/NUP35/TUBB6/FUS/NUP93/NUP50…	205
hsa05010	Alzheimer disease	215/4075	384/8098	0.0130032	0.0551801	0.0370266	EIF2S1/PSEN1/SLC39A9/PSMA3/CSNK2A1/PSMC6/NRAS/CSNK2A2/RTN4/TUBA1C/PSMA6/PLCB2/PSMD7/PSMB2/PSMD14/PSMD12/PSMC1/RELA/APP/PSMB5/ATG2B/TUBB/CALM1/NAE1/PSMA1/ADRM1/ATP2A3/DVL1/SLC25A5/KLC1/AKT1/PSMD1/PSMC2/IRS1/RB1CC1/NOS2/PSMD11/CYBB/CYCS/CACNA1D/PSMA7/PSMD2/HRAS/NDUFB9/PSMD13/VDAC1/CYC1/CACNA1F/CSNK1A1/KIF5B/PSMB7/FRAT1/KIF5C/TUBA4A/PSMB1/SDHB/ADAM10/FZD8/PLCB3/KIF5A/TUBB6/CHUK/NRBF2/FZD6/PPID/PSMD3…	215
hsa04120	Ubiquitin mediated proteolysis	85/4075	142/8098	0.0134019	0.0560633	0.0376192	UBE2W/UBR5/UBE2K/UBA6/SIAH1/UBE2C/UBE3C/DDB1/CUL4A/UBE2E3/UBE2Z/UBE2D3/UBE2J2/UBE2A/HERC4/UBA7/PRPF19/SKP2/WWP1/NEDD4/UBE2Q2/UBE2G1/CUL5/CDC20/UBE2H/ANAPC10/AIRE/UBC/HERC3/UBA2/UBE4A/ITCH/SAE1/PIAS2/ANAPC13/CUL2/BIRC3/BTRC/UBE2L3/UBE2N/CDC16/TRIP12/WWP2/ERCC8/TRAF6/UBE2O/RNF7/SMURF1/CBL/CUL1/UBE2I/UBE3B/TRIM37/RPS27A/ANAPC1/UBA1/UBE2D4/UBE2F/XIAP/UBE2Q1/RBX1/UBE4B/UBE2R2/CDC23/BIRC2/ANAPC4/SYVN1/…	85
hsa05218	Melanoma	46/4075	72/8098	0.0137194	0.0560633	0.0376192	NRAS/FGF18/CDK6/AKT1/IGF1/PDGFRA/HRAS/BAK1/MET/PDGFD/HGF/FGF2/EGFR/GADD45G/FGFR1/MITF/MAP2K1/AKT3/PIK3R1/FGF1/RB1/MAPK1/PDGFA/CDKN1A/FGF17/IGF1R/E2F3/PIK3R3/E2F2/GADD45A/FGF3/PDGFC/FGF23/PDGFRB/FGF20/CCND1/FGF19/GADD45B/FGF6/FGF9/CDH1/PTEN/MAP2K2/TP53/PIK3CD/MDM2	46
hsa05223	Non-small cell lung cancer	46/4075	72/8098	0.0137194	0.0560633	0.0376192	NRAS/SOS2/RARB/STAT5A/PRKCB/CDK6/AKT1/HRAS/BAK1/MET/KIF5B/KIF5C/TGFA/KIF5A/HGF/FHIT/EGFR/GADD45G/MAP2K1/AKT3/RXRA/RASSF5/PIK3R1/RB1/MAPK1/CDKN1A/ALK/RASSF1/E2F3/PIK3R3/E2F2/GADD45A/PLCG2/CASP9/PDPK1/GRB2/STK4/CCND1/STAT5B/PLCG1/ERBB2/GADD45B/EML4/MAP2K2/TP53/PIK3CD	46
hsa04666	Fc gamma R-mediated phagocytosis	60/4075	97/8098	0.0142072	0.0573487	0.0384817	CDC42/INPP5D/VAV1/CRK/WAS/PRKCB/AKT1/LAT/ARPC1A/MYO10/PLA2G6/HCK/PIP5K1B/PLA2G4C/ACTR3/LIMK2/SCIN/PTPRC/ACTR2/ARPC3/CRKL/VAV2/VASP/MAP2K1/AKT3/PIK3R1/RAC1/AMPH/ARPC5L/MAPK1/SPHK2/ASAP3/MARCKS/PIP5K1A/PAK1/PLA2G4E/PIK3R3/GAB2/PLA2G4D/PLCG2/WASF1/ARPC2/LIMK1/PLD2/ASAP1/WASF2/ARPC1B/SPHK1/RPS6KB1/DNM2/PLCG1/VAV3/SYK/FCGR2A/PLA2G4A/GSN/PLD1/CFL2/PIK3CD/BIN1	60
hsa04961	Endocrine and other factor-regulated calcium reabsorption	35/4075	53/8098	0.0149335	0.0583959	0.0391844	PLCB2/ATP1A1/ADCY6/CLTC/PRKCB/ATP1B3/ATP1B2/PLCB3/BDKRB2/PTH1R/ATP2B2/KL/ATP1A3/PLCB4/AP2M1/VDR/GNAS/AP2A1/CLTB/CLTCL1/DNM1/FXYD2/GNAQ/AP2B1/RAB11A/AP2A2/CLTA/AP2S1/ATP1A2/ATP2B1/DNM2/ATP2B3/ADCY9/PRKACB/ESR1	35
hsa05016	Huntington disease	173/4075	306/8098	0.0153556	0.0583959	0.0391844	ACTR10/PSMA3/RCOR1/PSMC6/TUBA1C/PSMA6/PLCB2/PSMD7/PSMB2/PSMD14/PSMD12/DNAH1/PSMC1/PSMB5/ATG2B/TUBB/CLTC/PSMA1/ADRM1/POLR2C/POLR2K/SLC25A5/KLC1/TBP/PSMD1/PSMC2/RB1CC1/PSMD11/PPARG/CYCS/PSMA7/PSMD2/NDUFB9/PSMD13/DNALI1/VDAC1/CYC1/KIF5B/PSMB7/KIF5C/TUBA4A/PSMB1/GPX3/SDHB/DCTN5/DLG4/PLCB3/KIF5A/TUBB6/HDAC1/NRBF2/PSMD3/BBC3/POLR2G/PSMA4/COX4I2/SLC25A4/PSMA5/UQCRC2/UQCRB/DNAH6/PSMD6/PSMD9/DCTN6/NDUFA12…	173
hsa00563	Glycosylphosphatidylinositol (GPI)-anchor biosynthesis	19/4075	26/8098	0.015585	0.0583959	0.0391844	PIGH/PIGW/PIGG/PIGK/PIGT/GPAA1/GPLD1/PIGU/PIGV/DPM2/PIGA/PIGO/MPPE1/PIGL/PIGB/PIGZ/PIGX/PIGF/PIGN	19
hsa04371	Apelin signaling pathway	83/4075	139/8098	0.0156461	0.0583959	0.0391844	GNG7/NRAS/PLCB2/RRAS2/ADCY6/GNB3/CALM1/GNG12/ADCY5/MAP1LC3A/AKT1/GNAI1/PIK3R6/PIK3CG/NOS2/KLF2/SLC9A1/HRAS/MAP1LC3C/GNB1/PLCB3/JAG1/MRAS/ADCY4/GNG5/PIK3R5/GNGT2/CAMK4/TGFBR1/MEF2B/GNAI3/APLN/TFAM/PLCB4/PDE3B/BECN1/PIK3R4/MAP2K1/AKT3/CALM2/MEF2C/SERPINE1/MAPK1/RYR1/SPHK2/PRKAB2/APLNR/ITPR1/LIPE/AGTR1/MYL3/MAP1LC3B/PRKAA2/PRKAG1/MEF2A/ADCY7/ADCY10/ITPR3/GNG2/PLAT/PRKAA1/GNAQ/ACTA2/NOS3/GNB5/MEF2D/S…	83
hsa05162	Measles	83/4075	139/8098	0.0156461	0.0583959	0.0391844	EIF2S1/CSNK2A1/CSNK2A2/EIF3H/HSPA8/BCL2/RELA/STAT5A/IL2RG/MAP3K7/HSPA2/CDK6/AKT1/SLAMF1/CYCS/CD28/BAK1/TLR7/EIF2AK1/TRAF3/MSN/TLR9/IRAK1/CD3G/CHUK/CD3D/IL2RB/IL12A/BBC3/CD3E/IL1A/GSK3B/FADD/TLR4/IKBKE/AKT3/CDKN1B/RAB9B/IL2RA/PIK3R1/CCNE2/TYK2/JAK1/HSPA1L/JUN/TRAF6/STAT1/DDX58/OAS3/NFKBIA/FASLG/PIK3R3/ADAR/CCNE1/OAS2/FOS/CASP9/IFIH1/CASP8/BCL2L1/CD209/CDK2/IKBKB/NFKB1/RAB9A/EIF2AK2/CCND1/MYD88/TBK…	83
hsa04071	Sphingolipid signaling pathway	72/4075	119/8098	0.0157016	0.0583959	0.0391844	PPP2R5E/NRAS/ADORA1/PPP2R5C/PLCB2/BCL2/RELA/SPTLC2/SGPP1/NSMAF/PRKCB/AKT1/GNAI1/HRAS/GNA12/FYN/PLCB3/BDKRB2/SGMS2/PPP2R2D/PPP2R1B/SGMS1/MAPK14/PPP2R2B/SPTLC1/SPTLC3/PPP2R2C/GNAI3/PRKCZ/FCER1G/TNFRSF1A/DEGS1/PLCB4/MAP2K1/PPP2CB/AKT3/MS4A2/PPP2R1A/PIK3R1/RAC1/MAPK1/SPHK2/PPP2R5D/S1PR1/PPP2R5B/FCER1A/OPRD1/PPP2R3A/RAC3/PIK3R3/ROCK1/GAB2/GNAQ/PLD2/NOS3/PDPK1/PPP2R3B/SPHK1/NFKB1/GNA13/S1PR3/ASAH1/PPP2…	72
hsa04935	Growth hormone synthesis, secretion and action	72/4075	119/8098	0.0157016	0.0583959	0.0391844	NRAS/PLCB2/SOS2/ADCY6/CRK/STAT5A/PTK2/GHRL/ADCY5/PRKCB/AKT1/GNAI1/IRS1/SSTR2/IGF1/CACNA1D/MAP2K4/HRAS/ATF6B/SHC1/CACNA1F/PLCB3/BCAR1/ADCY4/SHC2/CACNA1C/MAPK14/SSTR3/GSK3B/CRKL/MAP2K6/GNAI3/PLCB4/MAP2K1/AKT3/GNAS/PIK3R1/MAPK1/ITPR1/STAT1/ATF2/ADCY7/CREB3L4/JAK2/GHRHR/ADCY10/ITPR3/PIK3R3/PLCG2/GNAQ/FOS/SOCS2/EP300/SSTR1/MAP2K3/ATF4/GRB2/IGFBP3/CREB1/SHC3/JUNB/CREBBP/STAT5B/CREB3/PLCG1/GNA11/SHC4/MA…	72
hsa04940	Type I diabetes mellitus	29/4075	43/8098	0.0172664	0.0635021	0.0426107	HSPD1/ICA1/HLA-DMA/LTA/HLA-DOA/HLA-DMB/HLA-DPB1/PTPRN2/CD28/HLA-DPA1/IL12A/HLA-DOB/IL1A/HLA-DRA/HLA-DRB5/HLA-DRB1/CPE/PRF1/CD86/CD80/FASLG/HLA-DQA2/GAD1/IFNG/PTPRN/IL1B/HLA-E/FAS/GZMB	29
hsa03010	Ribosome	93/4075	158/8098	0.0182216	0.0659882	0.044279	MRPL15/RPL6/MRPL13/RPL36AL/MRPL19/RPL8/MRPL3/MRPL10/RPS20/RPL7/MRPS10/MRPL18/MRPL1/MRPL32/MRPS18C/MRPL9/MRPL17/RPL5/MRPS9/MRPL30/MRPL36/MRPS5/MRPL14/RPL26L1/MRPL16/RPS2/RPS12/FAU/RPS13/RPL27/RPL27A/RPL24/RPL36A/RPL29/MRPS15/RPL26/RPS29/RPS7/RPS15A/MRPL35/MRPS17/RPL19/RPS26/RPL22/MRPS2/RPS3/MRPL11/RPS8/RPS27A/RSL24D1/RPL41/MRPL21/MRPL2/RPL10A/RPL12/RPS18/RPL37/RPS24/RPS5/MRPS7/RPL4/RPLP0/RPL11/RPL…	93
hsa05134	Legionellosis	37/4075	57/8098	0.0183411	0.0659882	0.044279	HSPD1/HSPA8/ITGB2/RELA/HSPA2/RAB1B/ITGAM/CYCS/TLR5/RAB1A/VCP/BNIP3/ARF1/IL12A/CR1/BCL2L13/C3/SAR1A/TLR4/CLK4/EEF1A1/NLRC4/CD14/HSPA1L/NFKBIA/NAIP/CASP7/CASP9/CASP8/SAR1B/CASP1/NFKB1/HBS1L/MYD88/IL1B/NFKB2/IL18	37
hsa04925	Aldosterone synthesis and secretion	60/4075	98/8098	0.0189102	0.0673042	0.045162	PLCB2/ATP1A1/ADCY6/CALM1/ADCY5/PRKCB/CACNA1D/PRKD1/CYP11A1/ATF6B/CAMK2D/ATP1B3/CACNA1F/ATP1B2/PLCB3/ATP2B2/ADCY4/CACNA1I/CACNA1C/CAMK4/LDLR/AGT/KCNK3/ATP1A3/PLCB4/DAGLA/GNAS/CALM2/ATF1/CAMK1D/ITPR1/LIPE/AGTR1/POMC/ATF2/ADCY7/CREB3L4/DAGLB/ITPR3/NPR1/NR4A2/GNAQ/STAR/CAMK1G/ATF4/CACNA1H/PDE2A/ATP1A2/CREB1/CALML4/ATP2B1/KCNJ5/CREB3/ATP2B3/GNA11/NR4A1/CAMK2B/ADCY9/PRKACB/CREB3L2	60
hsa05163	Human cytomegalovirus infection	129/4075	225/8098	0.0192831	0.067901	0.0455624	MYC/GNG7/NRAS/PLCB2/PXN/RELA/SOS2/ADCY6/CRK/GNB3/PTK2/CALM1/GNG12/ADCY5/CX3CL1/CXCR4/PRKCB/CDK6/AKT1/GNAI1/CYCS/PDGFRA/HRAS/GNA12/ATF6B/BAK1/CXCL12/GNB1/TRAF5/IL10RA/PLCB3/BCAR1/CHUK/ADCY4/GNG5/EGFR/GNGT2/MAPK14/NFATC4/GSK3B/FADD/CCR1/CRKL/MAP2K6/GNAI3/CALR/PPP3CA/TNFRSF1A/PLCB4/MAP2K1/AKT3/GNAS/SRC/CALM2/PPP3R1/PIK3R1/PTGER4/RAC1/RB1/MAPK1/JAK1/ITPR1/CDKN1A/CCL5/EIF4EBP1/TAP2/TAP1/B2M/ATF2/NFATC…	129
hsa04020	Calcium signaling pathway	137/4075	240/8098	0.0195034	0.0679538	0.0455979	PLCB2/ADORA2A/P2RX1/CALM1/FGF18/ATP2A3/CXCR4/SLC25A5/PRKCB/NTRK3/NOS2/PDE1B/CACNA1D/PDGFRA/CAMK2D/CYSLTR1/VDAC1/P2RX4/BDKRB1/CACNA1F/MET/PDGFD/HTR2A/ORAI2/PLCB3/BDKRB2/PDE1A/P2RX2/HGF/ATP2B2/ADCY4/CACNA1I/NGF/ASPH/FGF2/EGFR/CACNA1C/CAMK4/HTR7/PLCE1/SLC25A4/GRIN2A/TACR2/PLCD4/VEGFC/FGFR1/PPP3CA/PLCB4/NTRK2/PLCD3/GNAS/ORAI3/CALM2/PPP3R1/VDAC2/GNA14/CACNA1B/PHKA2/ATP2A2/FGF1/MCOLN2/GNA15/RYR1/SPHK2/…	137
hsa05214	Glioma	47/4075	75/8098	0.0206671	0.0712584	0.0478153	NRAS/SOS2/CALM1/PRKCB/CDK6/AKT1/IGF1/PDGFRA/HRAS/CAMK2D/SHC1/BAK1/TGFA/EGFR/SHC2/CAMK4/GADD45G/MAP2K1/AKT3/CALM2/PIK3R1/RB1/MAPK1/PDGFA/CAMK1D/CDKN1A/IGF1R/E2F3/PIK3R3/E2F2/GADD45A/PLCG2/PDGFRB/CAMK1G/GRB2/SHC3/CCND1/CALML4/PLCG1/GADD45B/CAMK2B/PTEN/SHC4/MAP2K2/TP53/PIK3CD/MDM2	47
hsa05160	Hepatitis C	92/4075	157/8098	0.0218004	0.0739578	0.0496266	EIF2S1/YWHAB/YWHAZ/MYC/NRAS/PSME3/RELA/SOS2/EIF3E/YWHAG/CLDN5/CLDN11/CDK6/AKT1/CLDN10/YWHAQ/CYCS/HRAS/BAK1/EIF2AK1/TRAF3/CLDN3/NR1H3/CHUK/YWHAE/PPP2R2D/PPP2R1B/EGFR/LDLR/PPP2R2B/CLDN15/GSK3B/CLDN14/FADD/PPP2R2C/YWHAH/TNFRSF1A/IKBKE/MAP2K1/PPP2CB/AKT3/RXRA/PPP2R1A/CLDN18/PIK3R1/RB1/MAPK1/TYK2/JAK1/CDKN1A/TRAF6/STAT1/IFIT1/DDX58/OAS3/NFKBIA/E2F3/FASLG/CFLAR/PIK3R3/E2F2/OAS2/CASP9/CASP8/RNASEL/CLDN1…	92
hsa03420	Nucleotide excision repair	31/4075	47/8098	0.0219112	0.0739578	0.0496266	MNAT1/GTF2H3/RAD23B/DDB1/CUL4A/GTF2H1/PCNA/POLD2/POLE2/CETN2/XPC/CDK7/POLE4/GTF2H5/ERCC6/ERCC8/RFC1/RPA1/ERCC3/ERCC4/POLD3/RFC3/RFC2/RBX1/GTF2H4/RPA3/RAD23A/LIG1/ERCC2/CUL4B/RFC5	31
hsa05140	Leishmaniasis	48/4075	77/8098	0.0221203	0.0739578	0.0496266	HLA-DMA/ITGB2/RELA/PTPN6/HLA-DOA/HLA-DMB/MAP3K7/HLA-DPB1/PRKCB/NOS2/ITGAM/CYBB/NCF4/HLA-DPA1/IRAK1/CYBA/IL12A/ITGB1/CR1/C3/HLA-DOB/IFNGR1/MAPK14/IL1A/TLR4/EEF1A1/HLA-DRA/MAPK1/IL10/JAK1/HLA-DRB5/JUN/TRAF6/STAT1/HLA-DRB1/NFKBIA/JAK2/ITGA4/FOS/HLA-DQA2/IFNG/PTGS2/NFKB1/IFNGR2/MYD88/IL1B/FCGR2A/NCF2	48
