# Supplementary figures and images for: N1-Methyladenosine (m1A) Regulator-Mediated Methylation Modification Modes and Tumor Microenvironment Infiltration Characteristics in Head and Neck Squamous Cell Carcinomas
Source: Preprints.org preprint supplement (doi:10.20944/preprints202111.0004.v1), 2021-11-01

**A**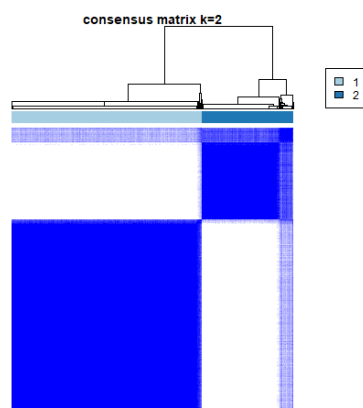**B**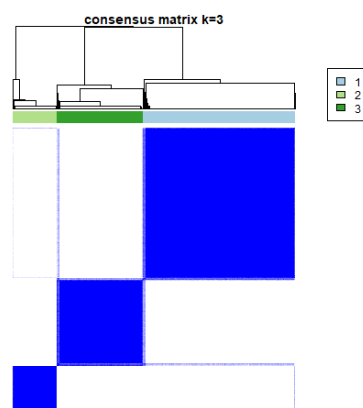**C**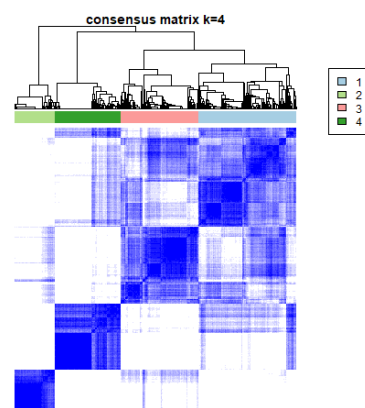**D**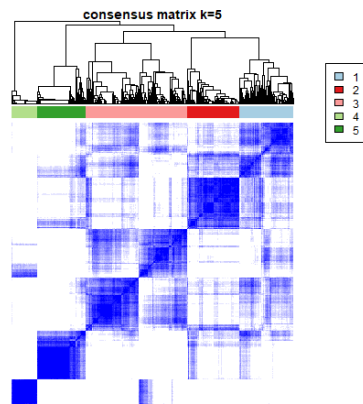**E**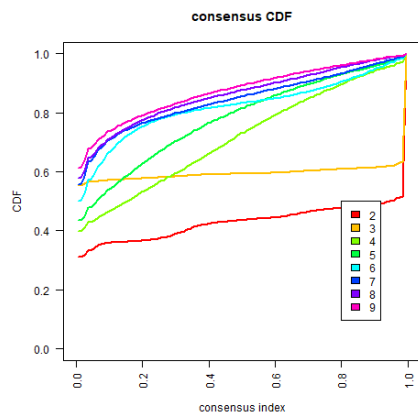**F**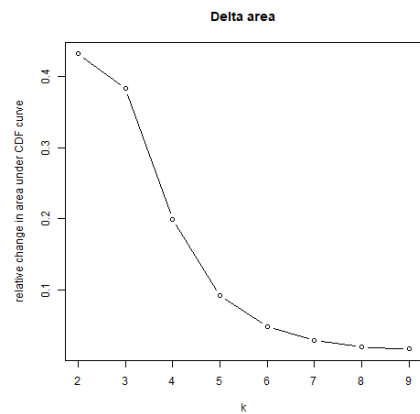

Supplement: Supplementary file 1 [file supplementary]

**A**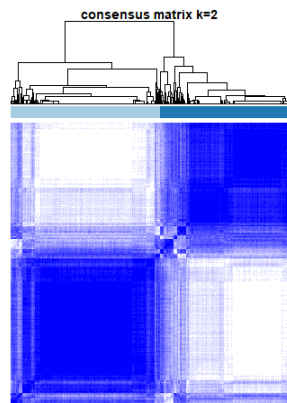**B**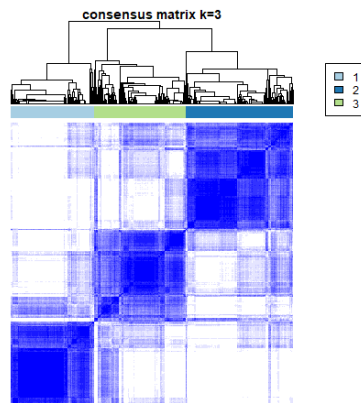**C**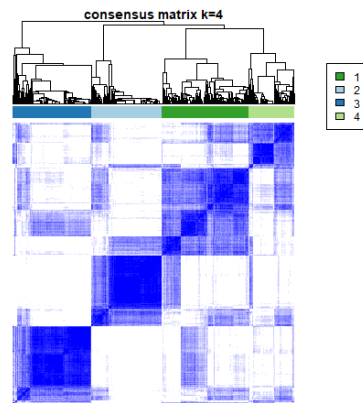**D**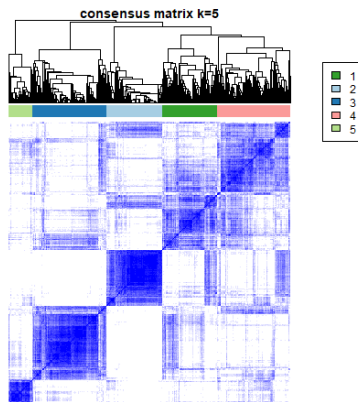**E**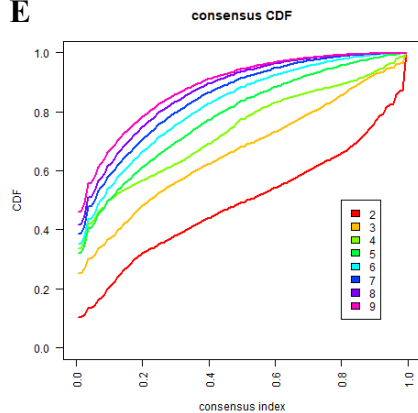**F**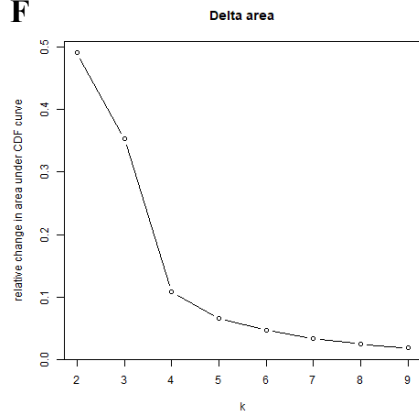

Supplement: Supplementary file 2 [file supplementary]
